# Supplementary material
Source: PubMed Central journal article supplement (PMC6408310)
Supplement: NIHMS1506169-supplement-12035_2018_1339_MOESM1_ESM.pdf [file NIHMS1506169-supplement-12035_2018_1339_MOESM1_ESM.pdf]

## Supplemental Materials

Transcriptomic analysis reveals sex-dependent expression patterns in the basolateral amygdala of dominant and subordinate animals after acute social conflict

Authors: Katharine E. McCann, David M. Sinkiewicz, Anna M. Rosenhauer, Linda Q. Beach, Kim L. Huhman

### *De novo* assembly and transcriptome optimization

RNA samples (n=18; 2 animals pooled for each sample (see *Methods*)) were measured on the Agilent Bioanalyzer before they were sent for sequencing. RNA integrity numbers (all over 9 out of a maximum value of 10) and sample concentrations are listed in Supplemental Table 1. Sequence quality analysis (FastQC) was completed after sequencing, and all base scores fell in the highest quality range (Supplemental Figure 2). The *de novo* assembly using Trinity revealed 1,244,719 Trinity 'genes'. Raw reads were then aligned back to the assembly revealing that proper pairs (left and right reads aligned to same contig) accounted for 80.78%, improper pairs (left and right reads align but to different contigs due to fragmentation) for 13.81%, left-only reads for 3.57%, and right-only reads for 1.84%.

The initial *de novo* assembly generated 1.2M possible genes, many more than are truly represented in the hamster amygdala. To control for any sequences that were assembled incorrectly during the *de novo* assembly process, we first optimized the assembly using TransDecoder to determine the number of probable coding sequences within the assembly. A schematic of the assembly optimization process is shown in Supplemental Figure 3. Complete coding sequences accounted for 528,193 of the 887,774 open reading frames. The remainder of the sequences were 5-prime partial (206,792), 3-prime partial (117,384), or internal (35,405). Because the sequencing protocol had a 3-prime bias, all sequences that were either complete or 5-prime partial were retained for the optimized assembly, as these were the sequences that were most likely to code for actual genes (Senatore et al., 2015; McCann et al., 2017). We also filtered the full assembly through BLASTx (Uniprot-rodent database, 1/21/16) to match the hamster sequences to known rodent gene sequences, returning 1,319,393 matches. Many of these were at low confidence parameters, thus only those with an E-value of  $\leq 1e-10$  and a percent identification match of  $\geq 50$  were included (148,726). These stringent parameters provide enhanced confidence in the quality of the optimized and annotated transcriptome (MacManes and Lacey, 2012; Feng et al., 2015; McCann et al., 2017). We then merged the data from TransDecoder and BLASTx, leaving 120,003 transcripts matching 14,493 unique BLAST identifiers. These numbers are consistent with our previous data from hamster whole brain (McCann et al., 2017), as well as data in humans and mice (Hastie et al., 1976; Venter et al., 2001; Su et al., 2004; Carninci et al., 2005).

## References

Carninci P, Kasukawa T, Katayama S, Gough J, Frith M, Maeda N, Oyama R, Ravasi T, Lenhard B, Wells C (2005). The transcriptional landscape of the mammalian genome. *Science* 309 (5740):1559-1563

Feng NY, Fergus DJ, Bass AH (2015). Neural transcriptome reveals molecular mechanisms for temporal control of vocalization across multiple timescales. *BMC Genomics* 16:408. doi:10.1186/s12864-015-1577-2

Hastie ND, Bishop JO (1976). The expression of three abundance classes of messenger RNA in mouse tissues. *Cell* 9 (4 PT 2):761-774

MacManes MD, Lacey EA (2012). The social brain: transcriptome assembly and characterization of the hippocampus from a social subterranean rodent, the colonial tuco-tuco (*Ctenomys sociabilis*). *PloS one* 7(9):e45524. doi:10.1371/journal.pone.0045524

McCann KE, Sinkiewicz DM, Norvelle A, Huhman KL (2017). De novo assembly, annotation, and characterization of the whole brain transcriptome of male and female Syrian hamsters. *Scientific Reports* 7:40472. doi:10.1038/srep40472

Senatore A, Edirisinghe N, Katz PS (2015). Deep mRNA sequencing of the *Tritonia diomedea* brain transcriptome provides access to gene homologues for neuronal excitability, synaptic transmission and peptidergic signalling. *PloS one* 10(2):e0118321. doi:10.1371/journal.pone.0118321

Su AI, Wiltshire T, Batalov S, Lapp H, Ching KA, Block D, Zhang J, Soden R, Hayakawa M, Kreiman G (2004). A gene atlas of the mouse and human protein-encoding transcriptomes. *Proceedings of the National Academy of Sciences of the United States of America* 101(16):6062-6067

Venter JC, Adams MD, Myers EW, Li PW, Mural RJ, Sutton GG, Smith HO, Yandell M, Evans CA, Holt RA (2001). The sequence of the human genome. *Science* 291 (5507):1304-1351

## Supplemental Figure Legends

### **Supplemental Figure 1: Dominant (left) and subordinate (right) males and females display similar behavioral patterns across each trial.**

**(a)** Timeline of experimental design. **(b)** During Trial 1, there was a significant interaction in dominant animals ( $F(3,36)=4.988$ ,  $p=0.0054$ , left panel). Dominant males exhibited significantly more non-social behavior than did dominant females ( $*p=0.0291$ ). There were no significant sex differences observed in other behaviors in dominant hamsters nor in any behavior in subordinate hamsters (right panel). Due to a technical malfunction, one behavioral pair was not fully recorded during Trial 1, and thus was not included in Trial 1 analyses. **(c-d)** There were no differences in behavior between males and females during **(c)** Trial 2 or **(d)** Trial 3. There was a significant main effect of behavior for each trial, with dominant animals displaying primarily aggression and subordinates displaying almost exclusively submission (Trial 1 dominants:  $F(3,36)=24.89$ ,  $p<0.0001$ ; Trial 1 subordinates:  $F(3,36)=184.9$ ,  $p<0.0001$ ; Trial 2 dominants:  $F(3,40)=36.43$ ,  $p<0.0001$ ; Trial 2 subordinates:  $F(3,40)=423.5$ ,  $p<0.0001$ ; Trial 3 dominants:  $F(3,40)=21.63$ ,  $p<0.0001$ ; Trial 3 subordinates:  $F(3,40)=439$ ,  $p<0.0001$ ).

**Supplemental Figure 2: FASTQC analysis revealed that all reads were of high quality.** Left and right reads all fell in the good quality (green) range for each base.

**Supplemental Figure 3: Schematic of assembly optimization process.** The optimization revealed 120,003 transcripts that mapped to 14,493 unique genes.

### **Supplemental Figure 4: RRHO analysis of all transcripts in the hamster amygdala.**

There was no correlation in **(a, b)** dominant males and females or **(c, d)** subordinate males and females when all transcripts were compared using rank rank hypergeometric overlap (RRHO). RRHO ranks the transcripts with the significantly increased transcripts first (bottom left) and the significantly decreased transcripts last (top right) on each panel (a and c). The heatmaps **(b, d)** show the  $\log_{10}$  transformed p-values of the overlapping transcripts in males and females according to the hypergeometric distribution. Higher (reds) values indicate transcripts that overlap more than expected by chance while lower (blues) values indicate lower than expected overlap. RRHO analysis reveals that the most highly expressed transcripts overlap the most (bottom left, red) between sexes (within status).

**Supplemental Figure 5: Top GO Terms represented in hamster amygdala.** (a) Molecular Functions, (b) Biological Processes, and (c) Protein Classes represented when all transcripts are analyzed. The numbers of transcripts in each category are shown in parentheses.

**Supplemental Figure 6: Top 40 pathways from GO analysis represented in the hamster amygdala.**

**Supplemental Figure 7: WGCNA divided the BLA transcripts into 138 distinct modules.** On the left, the color designation of the module, as randomly assigned by

WGNCA. Within each square, the correlation and the p-value for each group are listed. The modules that were significantly correlated with subordinate status or with dominant status are highlighted in Figure 6.

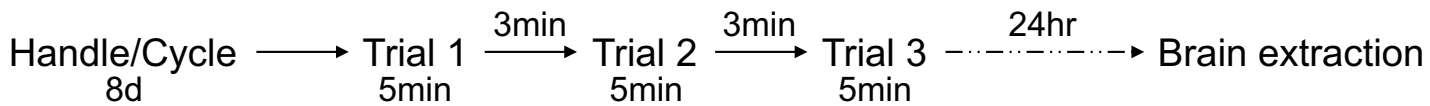

**b**

**Trial 1**

**Dominants**

**Subordinates**

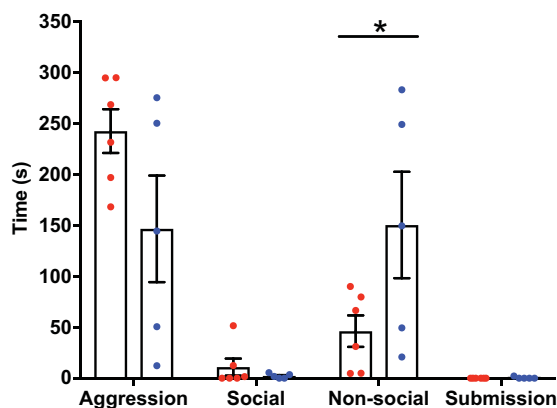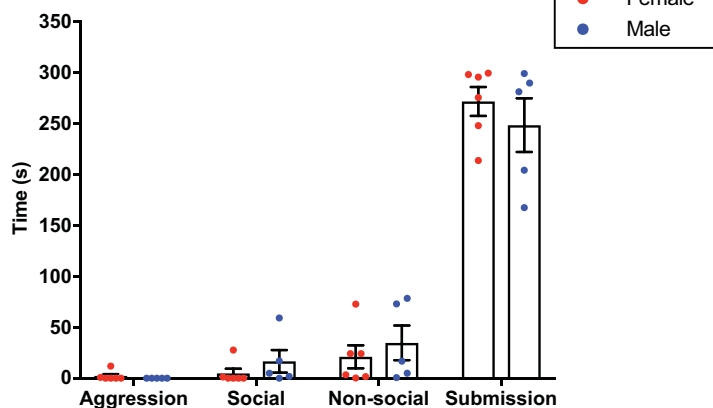

**c**

**Trial 2**

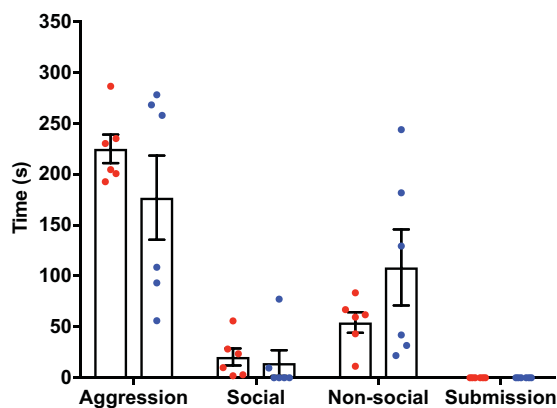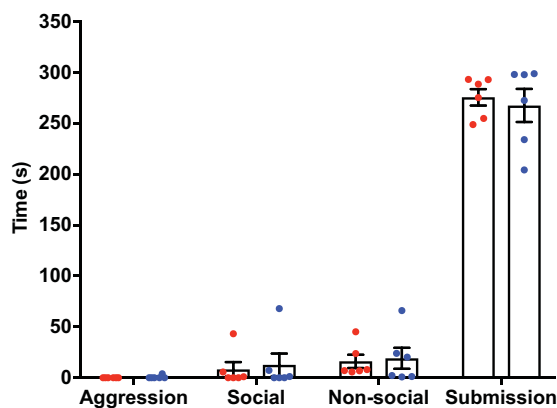

**d**

**Trial 3**

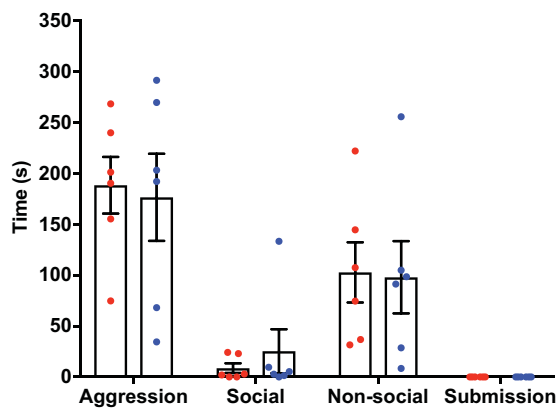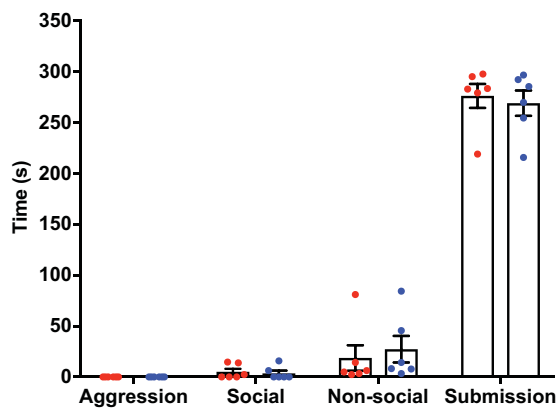

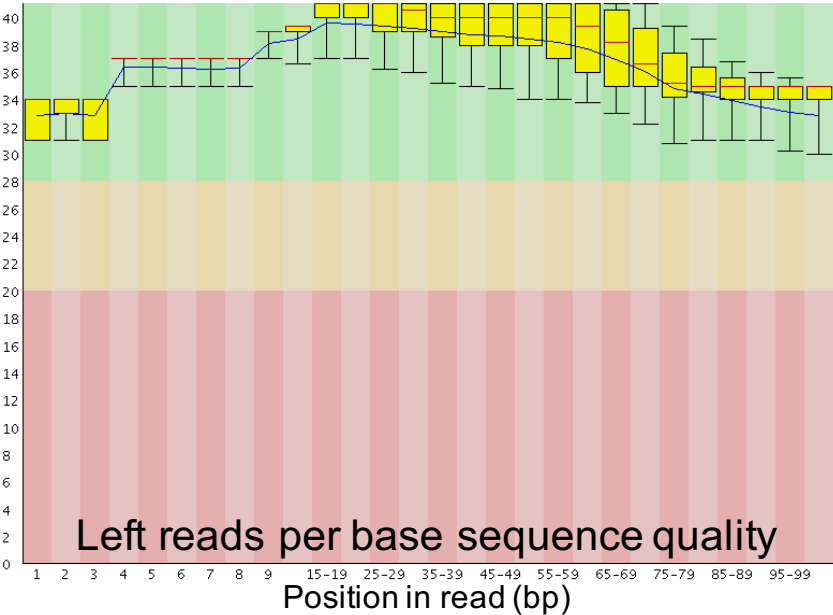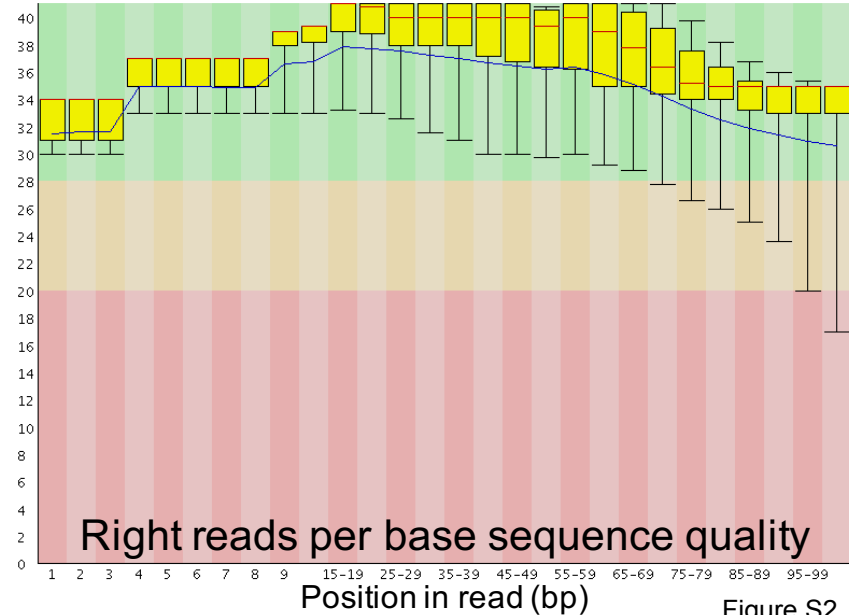

Figure S2

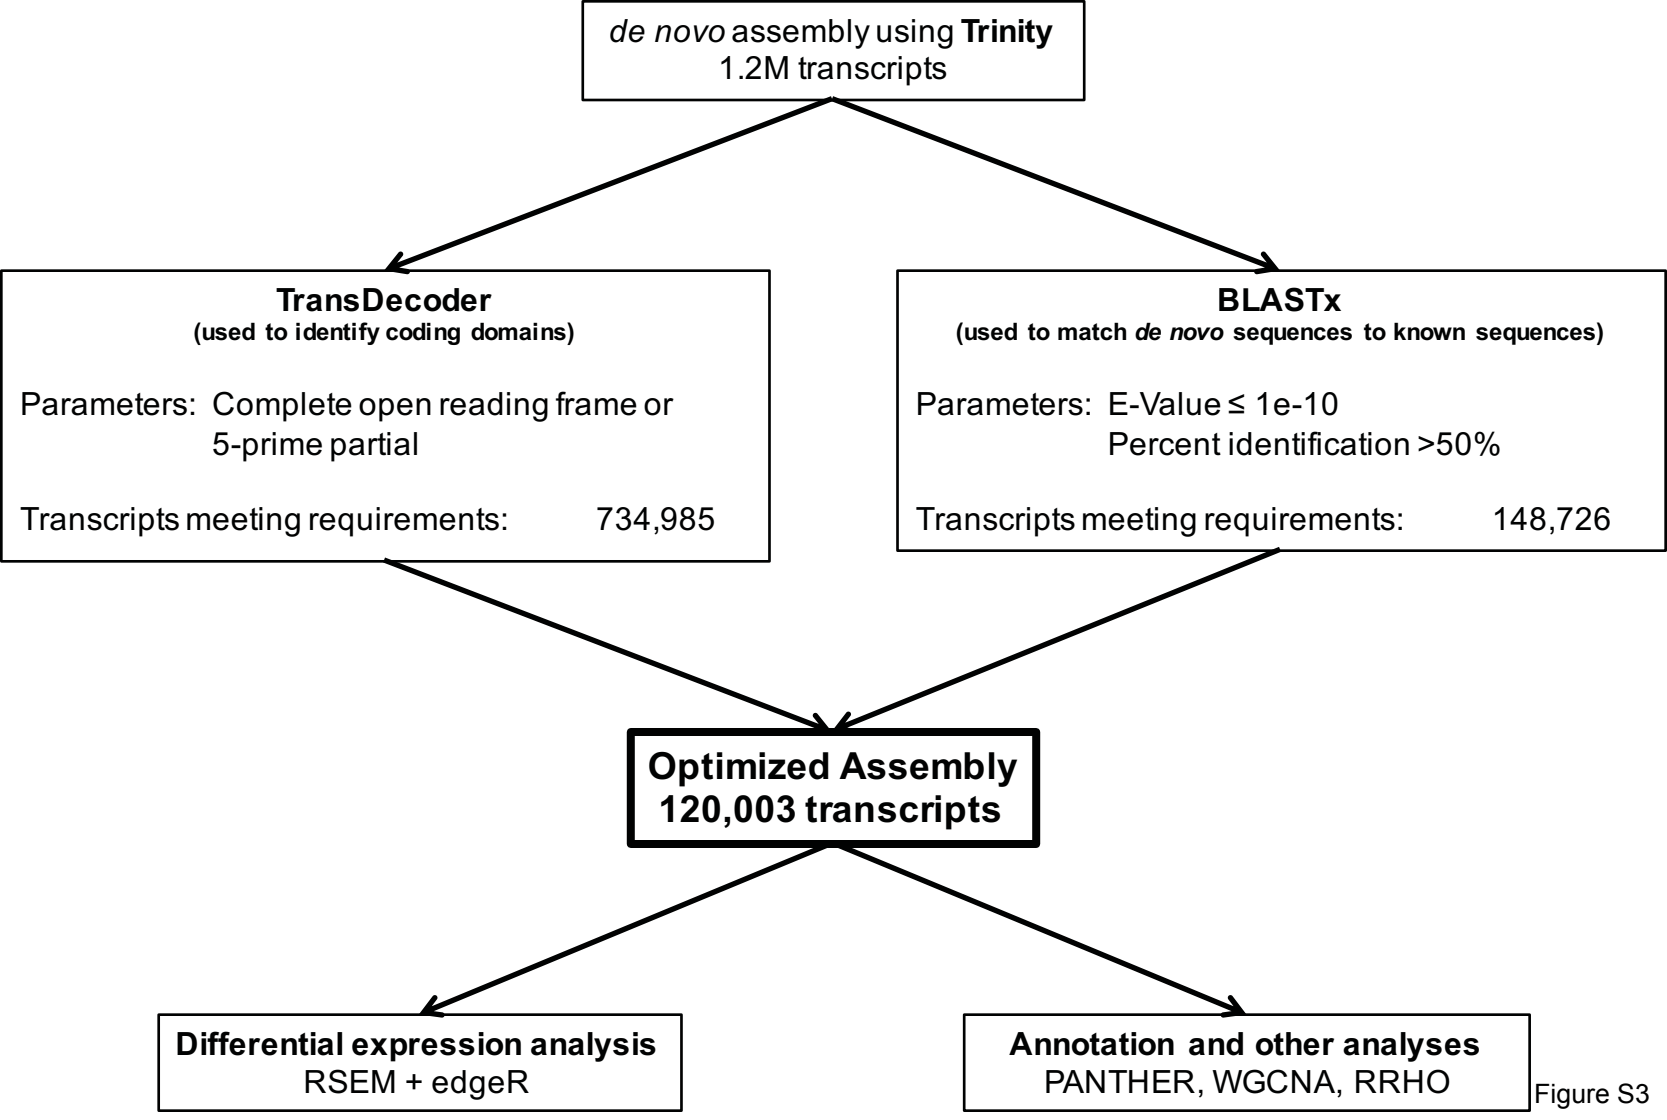

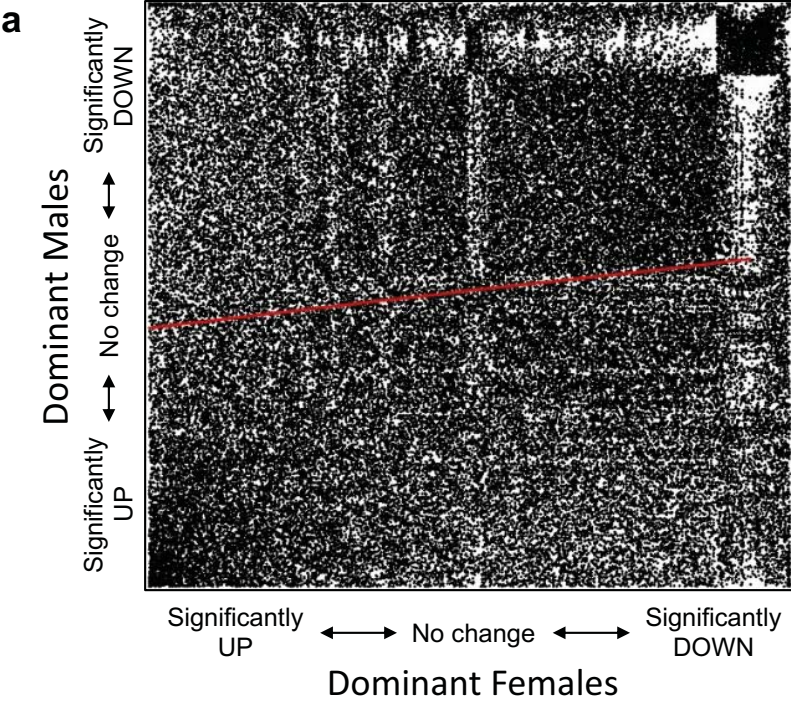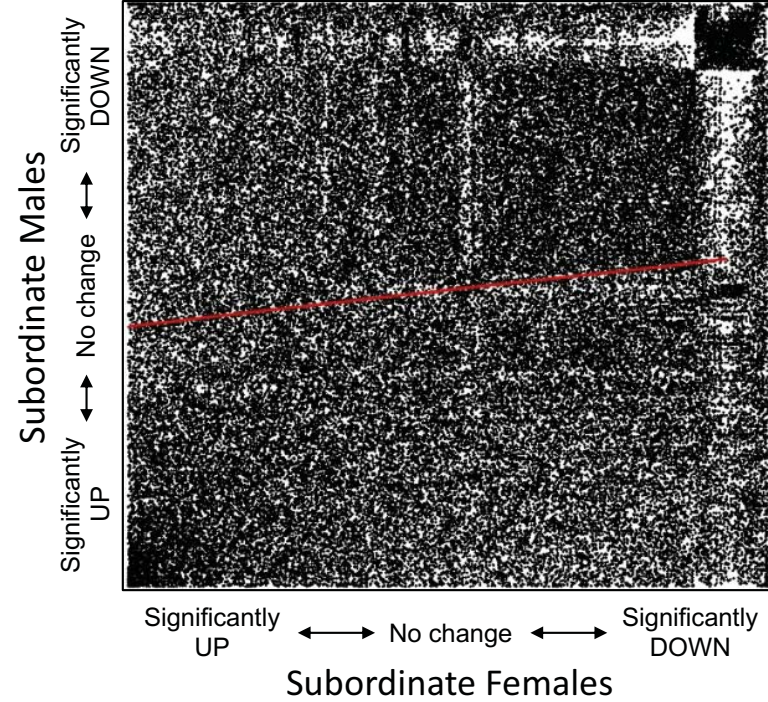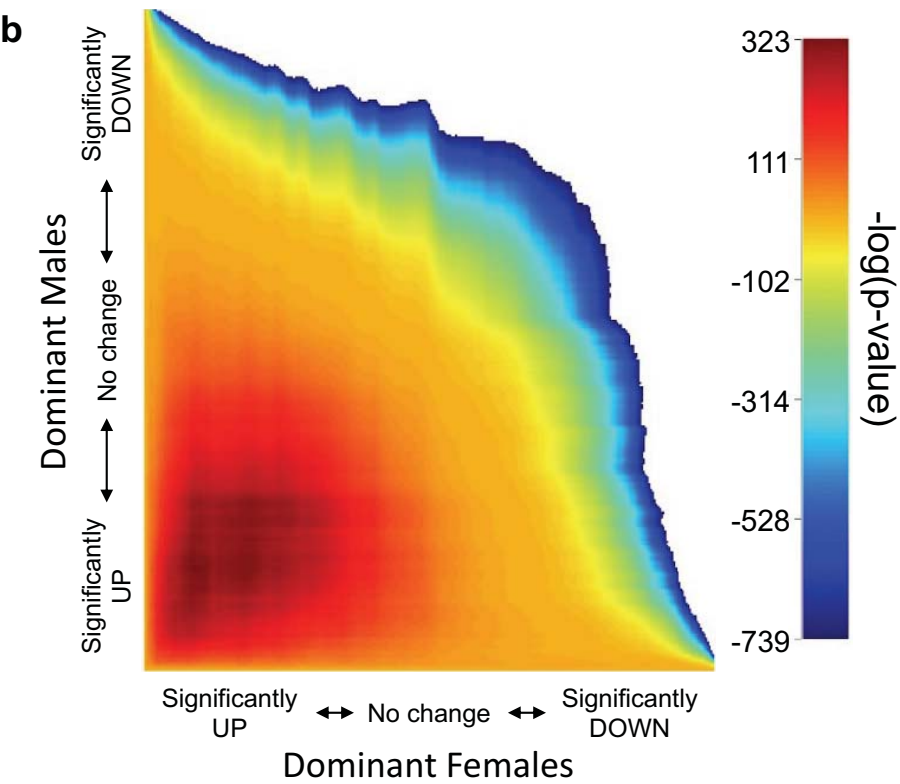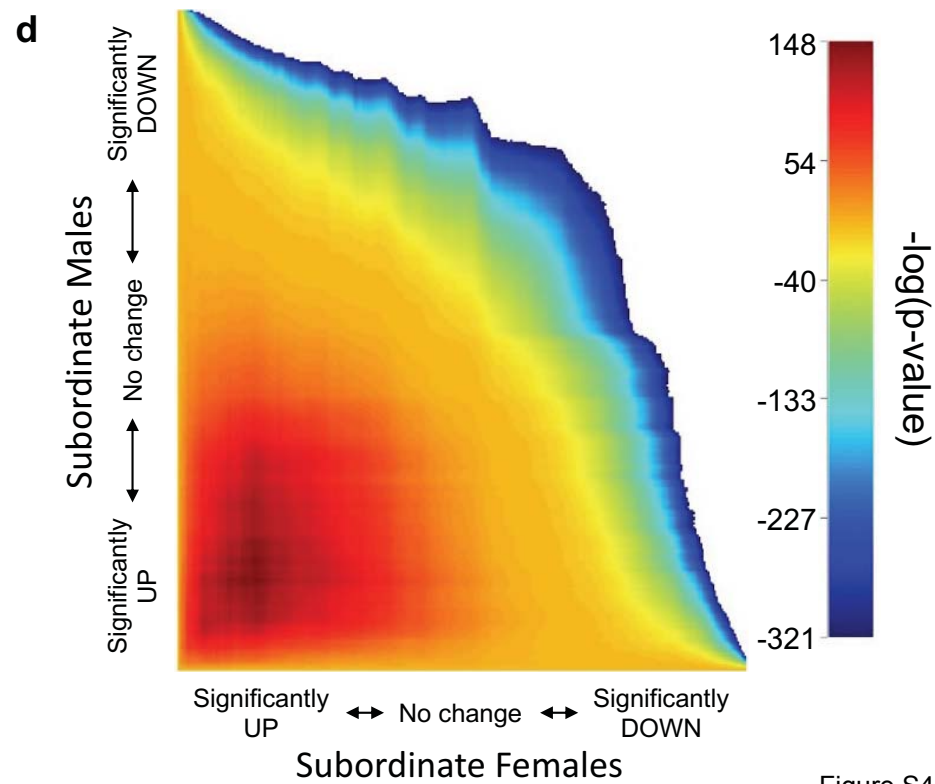

Figure S4



**a**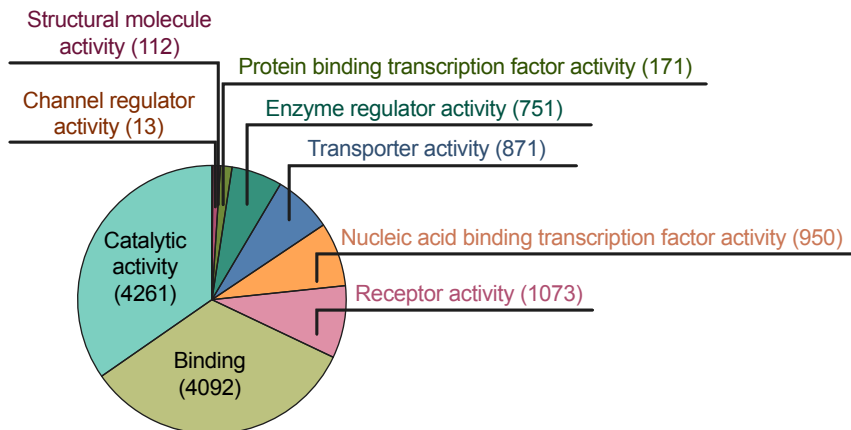

## Molecular Function

**b**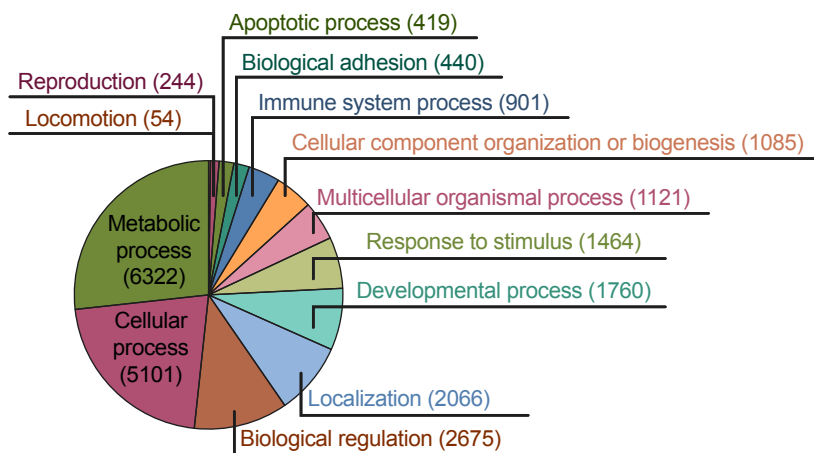

## Biological Process

**c**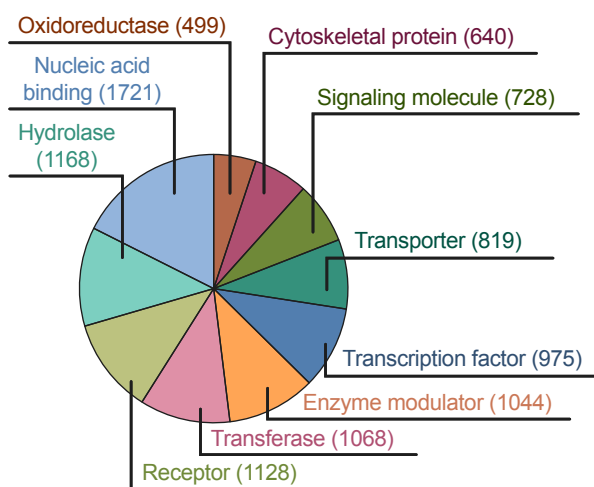

## Protein Class

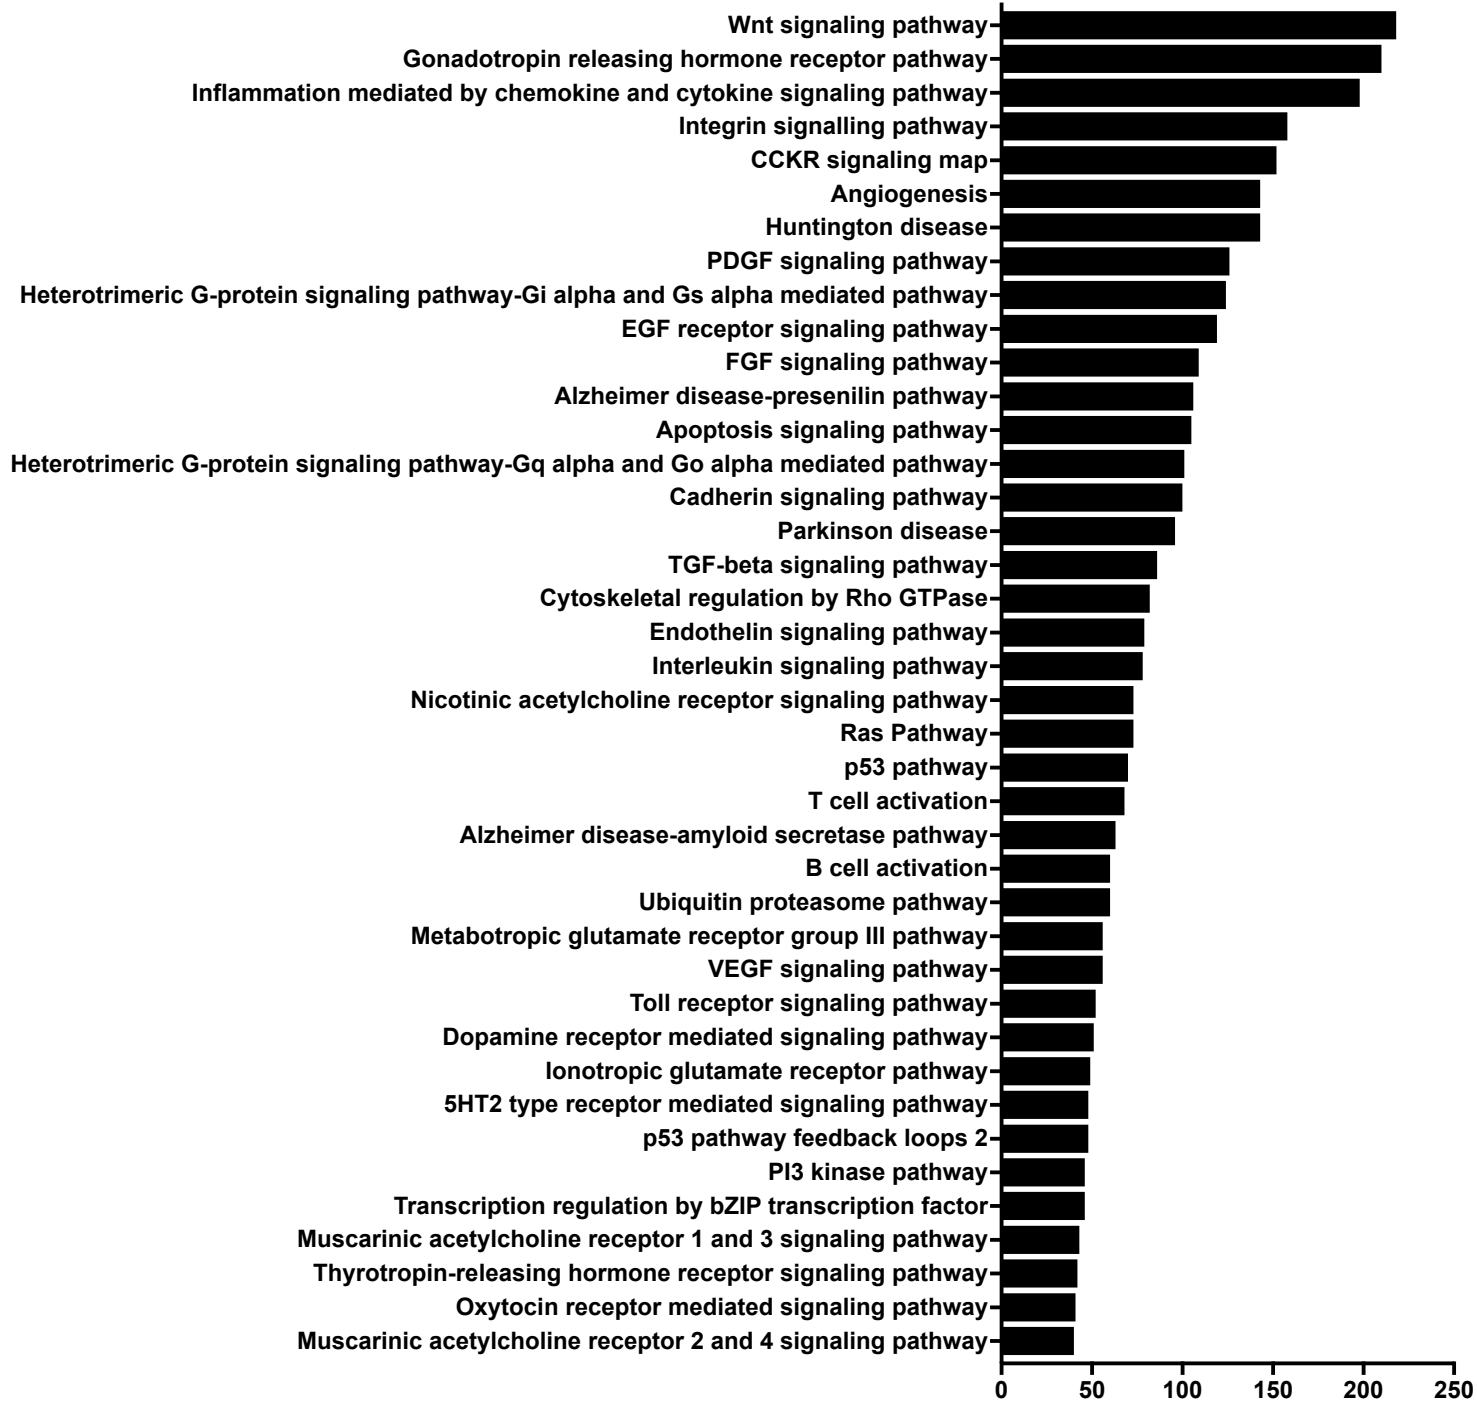



## **Supplemental Tables**

Transcriptomic analysis reveals sex-dependent expression patterns in the basolateral amygdala of dominant and subordinate animals after acute social conflict

McCann, Sinkiewicz, Rosenhauer, Beach, Huhman

Supplemental Table 1: RNA Integrity Numbers and Concentrations of each sample

Supplemental Table 2: Top 20 expressed genes in hamster amygdala

Supplemental Table 3: Differentially Expressed Transcripts

Supplemental Table 4: Enriched GO Terms in Dominant and Subordinate Females

**Supplemental Table 1: RNA Integrity Numbers (RIN) and concentrations for each sample used for RNA-Seq**

| <b>Sample</b>        | <b>RNA integrity number (RIN)</b> | <b>Concentration (ng/μl)</b> |
|----------------------|-----------------------------------|------------------------------|
| Female Control A     | 9.1                               | 191                          |
| Female Control B     | 9.1                               | 228                          |
| Female Control C     | 9.2                               | 127                          |
| Male Control A       | 9.2                               | 67                           |
| Male Control B       | 9.1                               | 137                          |
| Male Control C       | 9.0                               | 195                          |
| Female Subordinate A | 9.2                               | 173                          |
| Female Subordinate B | 9.0                               | 185                          |
| Female Subordinate C | 9.2                               | 101                          |
| Male Subordinate A   | 9.1                               | 295                          |
| Male Subordinate B   | 9.0                               | 155                          |
| Male Subordinate C   | 9.1                               | 254                          |
| Female Dominant A    | 9.3                               | 210                          |
| Female Dominant B    | 9.0                               | 75                           |
| Female Dominant C    | 9.1                               | 164                          |
| Male Dominant A      | 9.1                               | 214                          |
| Male Dominant B      | 9.2                               | 127                          |
| Male Dominant C      | 9.1                               | 183                          |

**Supplemental Table 2:** Top 20 most highly expressed genes in the amygdala of male and female hamsters.

\* Indicates genes that were also among the top 20 genes in the hamster brain (McCann et al., 2017).

| <b>Gene ID</b>   | <b>Gene</b>                                                       | <b>Uniprot ID</b> |
|------------------|-------------------------------------------------------------------|-------------------|
| <b>MT-CO2</b>    | Cytochrome c oxidase subunit 2                                    | COX2_MICNA        |
| <b>Mtnd2</b>     | NADH-ubiquinone oxidoreductase chain 2                            | NU2M_MOUSE        |
| <b>Eef1a1*</b>   | Elongation factor 1-alpha 1                                       | EF1A1_RAT         |
| <b>Scd2*</b>     | Acyl-CoA desaturase 2                                             | ACOD2_MOUSE       |
| <b>Cpe</b>       | Carboxypeptidase E                                                | CBPE_MOUSE        |
| <b>Map1a*</b>    | Microtubule-associated protein 1A                                 | MAP1A_MOUSE       |
| <b>GNAS</b>      | Guanine nucleotide-binding protein G(s) subunit alpha             | GNAS_MESAU        |
| <b>Calm1</b>     | Calmodulin                                                        | CALM_RAT          |
| <b>Atp1b1</b>    | Sodium/potassium-transporting ATPase subunit beta-1               | AT1B1_RAT         |
| <b>Hsp90aa1*</b> | Heat shock protein HSP 90-alpha                                   | HS90A_MOUSE       |
| <b>NSF</b>       | Vesicle-fusing ATPase                                             | NSF_CRIGR         |
| <b>Gapdh*</b>    | Glyceraldehyde-3-phosphate dehydrogenase                          | G3P_CRIGR         |
| <b>Actg1</b>     | Actin, cytoplasmic 2                                              | ACTG_RAT          |
| <b>Camk2a</b>    | Calcium/calmodulin-dependent protein kinase type II subunit alpha | KCC2A_RAT         |
| <b>Sparcl1</b>   | SPARC-like protein 1                                              | SPRL1_RAT         |
| <b>Slc1a3</b>    | Excitatory amino acid transporter 1                               | EAA1_RAT          |
| <b>Ywhaz</b>     | 14-3-3 protein zeta/delta                                         | 1433Z_RAT         |
| <b>Prickle3</b>  | Prickle-like protein 3                                            | PRIC3_MOUSE       |
| <b>Gpm6b</b>     | Neuronal membrane glycoprotein M6-b                               | GPM6B_RAT         |
| <b>Tspan7</b>    | Tetraspanin-7                                                     | TSN7_MOUSE        |

**Supplemental Table 3:** Differentially expressed transcripts between animals of different social status and their expression patterns in females and males.Trinity Transcript ID = Transcript identification number assigned during *de novo* assembly; Uniprot ID = Identification to be used at uniprot.org

Sub = Subordinate; Dom = Dominant; Con = Socially neutral control; log2FC = log2 fold change; FDR = false discovery rate

| Trinity Transcript ID | Uniprot ID  | Expression Change in Females (log2FC; FDR)                         | Expression Change in Males (log2FC; FDR)                                     | Gene                                                                            |
|-----------------------|-------------|--------------------------------------------------------------------|------------------------------------------------------------------------------|---------------------------------------------------------------------------------|
| TR234744 c0_g3_i12    | 2A5G_MOUSE  | Down in Sub v. Con (-8.28; 0.0174)                                 | No change in males                                                           | Serine/threonine-protein phosphatase 2A 56 kDa regulatory subunit gamma isoform |
| TR282126 c10_g3_i4    | 4EBP2_MOUSE | No change in females                                               | Down in Dom v. Con (-10.34; 1.91e-05)<br>Down in Dom v. Sub (-10.68; 0.0026) | Eukaryotic translation initiation factor 4E-binding protein 2                   |
| TR622108 c5_g2_i4     | A4_RAT      | Up in Dom v. Con (6.24; 0.04)                                      | No change in males                                                           | Amyloid-beta A4 protein                                                         |
| TR478913 c8_g1_i10    | ABCD3_MOUSE | No change in females                                               | Up in Sub v. Con (8.65; 0.0266)                                              | ATP-binding cassette sub-family D member 3                                      |
| TR442240 c3_g1_i14    | ABHD6_RAT   | Up in Dom v. Con (9.41; 0.0475)<br>Up in Dom v. Sub (9.33; 0.0467) | No change in males                                                           | Monoacylglycerol lipase ABHD6                                                   |
| TR20067 c5_g1_i4      | ACADV_RAT   | No change in females                                               | Up in Sub v. Dom (8.46; 0.0084)                                              | Very long-chain specific acyl-CoA dehydrogenase, mitochondrial                  |
| TR602200 c9_g2_i2     | ACD10_MOUSE | Up in Sub v. Dom (9.29; 0.0488)                                    | No change in males                                                           | Acyl-CoA dehydrogenase family member 10                                         |
| TR686210 c5_g2_i2     | ACM2_RAT    | Down in Sub v. Con (-8.54; 0.0034)                                 | No change in males                                                           | Muscarinic acetylcholine receptor M2                                            |
| TR209240 c6_g6_i20    | ACOX1_RAT   | No change in females                                               | Up in Sub v. Dom (8.34; 0.0201)                                              | Peroxisomal acyl-coenzyme A oxidase 1                                           |
| TR534467 c17_g4_i15   | ACSL6_MOUSE | No change in females                                               | Up in Sub v. Dom (8.02; 0.0456)                                              | Long-chain-fatty-acid--CoA ligase 6                                             |
| TR354883 c8_g4_i7     | ACSM5_MOUSE | No change in females                                               | Up in Dom v. Con (8.67; 0.0254)                                              | Acyl-coenzyme A synthetase ACSM5, mitochondrial                                 |
| TR166210 c2_g3_i4     | ACYP2_MOUSE | No change in females                                               | Up in Dom v. Con (10.14; 0.023)<br>Up in Sub v. Con (10.11; 0.0284)          | Acylphosphatase-2                                                               |
| TR82040 c4_g1_i9      | ADA12_MOUSE | Up in Dom v. Con (8.90; 0.0014)                                    | No change in males                                                           | Disintegrin and metalloproteinase domain-containing protein 12                  |
| TR634973 c5_g1_i8     | ADCY3_RAT   | No change in females                                               | Down in Dom v. Con (-8.62; 0.023)                                            | Adenylate cyclase type 3                                                        |
| TR250569 c4_g2_i18    | ADK_CRIGR   | Up in Dom v. Sub (9.50; 6.03e-05)                                  | No change in males                                                           | Adenosine kinase                                                                |
| TR175064 c1_g1_i4     | AKAP5_MOUSE | No change in females                                               | Down in Sub v. Con (-9.65; 0.0425)<br>Down in Sub v. Dom (-9.30; 0.0004)     | A-kinase anchor protein 5                                                       |

| Trinity Transcript ID | Uniprot ID  | Expression Change in Females<br>(log2FC; FDR)                                      | Expression Change in Males<br>(log2FC; FDR)                                      | Gene                                                        |
|-----------------------|-------------|------------------------------------------------------------------------------------|----------------------------------------------------------------------------------|-------------------------------------------------------------|
| TR170024 c2_g1_i13    | AKNA_MOUSE  | Up in Dom v. Sub<br>(8.44; 0.0058)                                                 | Up in Sub v. Dom<br>(8.89; 0.0009)                                               | AT-hook-containing transcription factor                     |
| TR746326 c3_g3_i4     | AL1A1_MESAU | No change in females                                                               | Down in Dom v. Con<br>(-10.01; 0.0037)                                           | Retinal dehydrogenase 1                                     |
| TR410667 c2_g3_i7     | ANK3_RAT    | Down in Sub v. Con<br>(-10.86; 4.20e-06)<br>Down in Sub v. Dom<br>(-10.75; 0.0022) | No change in males                                                               | Ankyrin-3                                                   |
| TR685188 c7_g6_i2     | ANKR6_MOUSE | No change in females                                                               | Down in Dom v. Con<br>(-10.93; 0.0059)<br>Down in Dom v. Sub<br>(-10.93; 0.0015) | Ankyrin repeat domain-containing protein 6                  |
| TR79130 c9_g3_i5      | ANM7_CRILO  | Up in Dom v. Con<br>(6.26; 1.41e-05)                                               | No change in males                                                               | Protein arginine N-methyltransferase 7                      |
| TR674922 c12_g4_i11   | ANS1A_MOUSE | No change in females                                                               | Up in Dom v. Sub<br>(8.69; 0.0016)                                               | Ankyrin repeat and SAM domain-containing protein 1A         |
| TR87184 c1_g1_i7      | AP1B1_MOUSE | Down in Sub v. Con<br>(-9.32; 0.0415)                                              | No change in males                                                               | AP-1 complex subunit beta-1                                 |
| TR643243 c6_g2_i10    | AP1G1_MOUSE | Up in Dom v. Sub<br>(7.06; 0.0009)                                                 | No change in males                                                               | AP-1 complex subunit gamma-1                                |
| TR759306 c12_g2_i10   | AP1S2_MOUSE | Up in Sub v. Con<br>(9.03; 0.029)<br>Up in Sub v. Dom<br>(8.96; 0.0382)            | No change in males                                                               | AP-1 complex subunit sigma-2                                |
| TR395328 c1_g3_i4     | APBB1_MOUSE | Down in Sub v. Con<br>(-9.28; 0.0445)                                              | No change in males                                                               | Amyloid-beta A4 precursor protein-binding family B member 1 |
| TR232380 c7_g1_i2     | APC2_MOUSE  | Up in Dom v. Con<br>(11.64; 5.44e-17)<br>Up in Sub v. Con<br>(10.6; 0.0023)        | No change in males                                                               | Adenomatous polyposis coli protein 2                        |
| TR247634 c14_g1_i13   | API5_MOUSE  | No change in females                                                               | Down in Dom v. Con<br>(-6.88; 0.029)                                             | Apoptosis inhibitor 5                                       |
| TR640930 c13_g1_i11   | AREL1_MOUSE | No change in females                                                               | Up in Sub v. Dom<br>(9.45; 1.3e-05)                                              | Apoptosis-resistant E3 ubiquitin protein ligase 1           |
| TR242953 c1_g2_i1     | ARHG4_MOUSE | No change in females                                                               | Up in Sub v. Con<br>(8.74; 0.0245)                                               | Rho guanine nucleotide exchange factor 4                    |
| TR309220 c6_g4_i10    | ARHGB_RAT   | No change in females                                                               | Up in Dom v. Con<br>(8.7; 0.0273)                                                | Rho guanine nucleotide exchange factor 11                   |
| TR500495 c2_g1_i1     | ARI5B_MOUSE | Up in Dom v. Con<br>(9.06; 0.0005)                                                 | No change in males                                                               | AT-rich interactive domain-containing protein 5B            |
| TR218070 c0_g1_i7     | ASPG_RAT    | No change in females                                                               | Down in Dom v. Con<br>(-9.01; 0.0038)<br>Down in Sub v. Con<br>(-8.93; 0.0062)   | N(4)-(Beta-N-acetylglucosaminy)-L-asparaginase              |



| Trinity Transcript ID | Uniprot ID  | Expression Change in Females<br>(log2FC; FDR)                           | Expression Change in Males<br>(log2FC; FDR)                                          | Gene                                                       |
|-----------------------|-------------|-------------------------------------------------------------------------|--------------------------------------------------------------------------------------|------------------------------------------------------------|
| TR23184 c8_g2_i2      | ASTN1_MOUSE | Up in Dom v. Sub<br>(9.15; 0.0033)                                      | No change in males                                                                   | Astrotactin-1                                              |
| TR443187 c0_g1_i3     | ASXL3_MOUSE | No change in females                                                    | Up in Sub v. Con<br>(8.45; 0.0302)                                                   | Putative Polycomb group protein ASXL3                      |
| TR245325 c7_g1_i2     | AT8A2_MOUSE | No change in females                                                    | Up in Dom v. Con<br>(8.49; 0.029)                                                    | Phospholipid-transporting ATPase IB                        |
| TR158276 c6_g4_i13    | ATG2B_MOUSE | No change in females                                                    | Up in Dom v. Sub<br>(9.33; 0.0459)                                                   | Autophagy-related protein 2 homolog B                      |
| TR702298 c1_g2_i17    | ATL1_MOUSE  | Down in Sub v. Con<br>(-8.27; 0.0274)                                   | No change in males                                                                   | ADAMTS-like protein 1                                      |
| TR193800 c13_g3_i2    | ATLA1_RAT   | No change in females                                                    | Up in Dom v. Con<br>(9.76; 6.00e-05)<br>Up in Sub v. Con<br>(9.2; 0.0007)            | Atlastin-1                                                 |
| TR535735 c4_g2_i3     | ATR_MOUSE   | No change in females                                                    | Up in Dom v. Con<br>(8.81; 0.015)                                                    | Serine/threonine-protein kinase ATR                        |
| TR575223 c0_g1_i3     | BACE2_MOUSE | No change in females                                                    | Up in Dom v. Sub<br>(5.46; 0.011)                                                    | Beta-secretase 2                                           |
| TR306564 c5_g5_i4     | BARD1_MOUSE | Up in Sub v. Con<br>(8.17; 0.0273)                                      | No change in males                                                                   | BRCA1-associated RING domain protein 1                     |
| TR159651 c4_g2_i5     | BARD1_RAT   | Down in Sub v. Con<br>(-9.76; 0.0184)                                   | No change in males                                                                   | BRCA1-associated RING domain protein 1                     |
| TR615201 c6_g3_i6     | BCORL_MOUSE | Down in Sub v. Con<br>(-8.32; 0.018)                                    | No change in males                                                                   | BCL-6 corepressor-like protein 1                           |
| TR615201 c6_g3_i7     | BCORL_MOUSE | Up in Sub v. Con<br>(8.71; 0.0274)                                      | No change in males                                                                   | BCL-6 corepressor-like protein 1                           |
| TR67576 c1_g2_i6      | BMR1A_MOUSE | Down in Sub v. Con<br>(-9.9; 0.0174)                                    | No change in males                                                                   | Bone morphogenetic protein receptor type-1A                |
| TR560446 c0_g1_i3     | BMR1B_MOUSE | No change in females                                                    | Up in Dom v. Con<br>(8.35; 0.0365)                                                   | Bone morphogenetic protein receptor type-1B                |
| TR496126 c7_g2_i22    | CA2D2_MOUSE | Up in Dom v. Con<br>(8.42; 0.0089)<br>Up in Sub v. Con<br>(9.36; 0.035) | No change in males                                                                   | Voltage-dependent calcium channel subunit alpha-2/delta-2  |
| TR424497 c7_g2_i7     | CAB45_MOUSE | Down in Dom v. Con<br>(-2.98; 0.0068)                                   | No change in males                                                                   | 45 kDa calcium-binding protein                             |
| TR519843 c18_g4_i28   | CABIN_RAT   | No change in females                                                    | Up in Sub v. Dom<br>(8.21; 0.0201)                                                   | Calcineurin-binding protein cabin-1                        |
| TR94552 c4_g2_i11     | CABYR_MOUSE | No change in females                                                    | Up in Dom v. Sub<br>(8.29; 0.0156)                                                   | Calcium-binding tyrosine phosphorylation-regulated protein |
| TR694532 c3_g2_i13    | CAC1E_RAT   | Down in Dom v. Con<br>(-9.66; 0.0289)                                   | Down in Dom v. Con<br>(-10.46; 2.02e-08)<br>Down in Sub v. Con<br>(-10.37; 3.67e-08) | Voltage-dependent R-type calcium channel subunit alpha-1E  |

| Trinity Transcript ID | Uniprot ID  | Expression Change in Females<br>(log2FC; FDR)                                | Expression Change in Males<br>(log2FC; FDR)                                   | Gene                                                      |
|-----------------------|-------------|------------------------------------------------------------------------------|-------------------------------------------------------------------------------|-----------------------------------------------------------|
| TR694532 c3_g2_i14    | CAC1E_RAT   | Up in Dom v. Sub<br>(11.14; 9.01e-19)                                        | No change in males                                                            | Voltage-dependent R-type calcium channel subunit alpha-1E |
| TR694532 c3_g2_i10    | CAC1E_RAT   | Up in Sub v. Dom<br>(2.54; 0.0107)                                           | No change in males                                                            | Voltage-dependent R-type calcium channel subunit alpha-1E |
| TR604362 c7_g3_i6     | CAC1H_RAT   | Up in Sub v. Dom<br>(8.5; 0.0058)                                            | Up in Sub v. Con<br>(9; 0.0037)                                               | Voltage-dependent T-type calcium channel subunit alpha-1H |
| TR748348 c15_g2_i4    | CACB4_MOUSE | No change in females                                                         | Down in Sub v. Con<br>(-10.53; 0.0462)                                        | Voltage-dependent L-type calcium channel subunit beta-4   |
| TR719666 c4_g1_i6     | CAN15_MOUSE | Down in Sub v. Con<br>(-9.79; 0.0173)                                        | No change in males                                                            | Calpain-15                                                |
| TR517507 c15_g2_i1    | CASC4_MOUSE | No change in females                                                         | Down in Dom v. Con<br>(-7.66; 5.53e-07)                                       | Protein CASC4                                             |
| TR277565 c5_g1_i15    | CB068_MOUSE | No change in females                                                         | Up in Dom v. Sub<br>(8.1; 0.0297)                                             | UPF0561 protein C2orf68 homolog                           |
| TR85002 c0_g3_i11     | CBLB_RAT    | No change in females                                                         | Up in Dom v. Con<br>(9.85; 0.0423)                                            | E3 ubiquitin-protein ligase CBL-B                         |
| TR113925 c8_g2_i5     | CCD92_MOUSE | Down in Sub v. Con<br>(-4.24; 0.029)                                         | No change in males                                                            | Coiled-coil domain-containing protein 92                  |
| TR157408 c3_g1_i23    | CCM2_MOUSE  | Up in Dom v. Con<br>(8.61; 0.0046)<br>Up in Dom v. Sub<br>(8.53; 0.0053)     | No change in males                                                            | Cerebral cavernous malformations protein 2 homolog        |
| TR633248 c7_g1_i8     | CCNL1_MOUSE | Up in Dom v. Con<br>(8.27; 0.0193)<br>Up in Sub v. Con<br>(8.92; 0.0006)     | No change in males                                                            | Cyclin-L1                                                 |
| TR239215 c4_g1_i8     | CCSE2_MOUSE | No change in females                                                         | Up in Dom v. Con<br>(10.21; 7.80e-07)                                         | Serine-rich coiled-coil domain-containing protein 2       |
| TR190655 c14_g1_i10   | CDK5_MOUSE  | Up in Dom v. Con<br>(9.83; 0.0184)<br>Up in Sub v. Con<br>(10.5; 8.68e-13)   | No change in males                                                            | Cyclin-dependent-like kinase 5                            |
| TR190655 c14_g1_i8    | CDK5_MOUSE  | Up in Dom v. Con<br>(10.51; 0.0043)<br>Up in Sub v. Con<br>(11.22; 6.30e-16) | No change in males                                                            | Cyclin-dependent-like kinase 5                            |
| TR576923 c1_g3_i12    | CELR3_MOUSE | Up in Dom v. Sub<br>(8.53; 0.0111)                                           | No change in males                                                            | Cadherin EGF LAG seven-pass G-type receptor 3             |
| TR659894 c2_g1_i6     | CENPC_MOUSE | Up in Sub v. Con<br>(5.13; 0.274)                                            | No change in males                                                            | Centromere protein C                                      |
| TR483264 c6_g2_i13    | CF089_RAT   | No change in females                                                         | Down in Dom v. Con<br>(-9.07; 0.0029)<br>Down in Dom v. Sub<br>(-8.2; 0.0341) | Bombesin receptor-activated protein C6orf89 homolog       |

| Trinity Transcript ID | Uniprot ID  | Expression Change in Females<br>(log2FC; FDR)                                  | Expression Change in Males<br>(log2FC; FDR)                                        | Gene                                                      |
|-----------------------|-------------|--------------------------------------------------------------------------------|------------------------------------------------------------------------------------|-----------------------------------------------------------|
| TR544530 c12_g5_i3    | CF106_MOUSE | Up in Sub v. Con<br>(9.32; 6.32e-06)                                           | No change in males                                                                 | Uncharacterized protein C6orf106 homolog                  |
| TR327832 c0_g1_i7     | CGAT1_MOUSE | Up in Sub v. Con<br>(8.22; 0.0274)                                             | No change in males                                                                 | Chondroitin sulfate N-acetylgalactosaminyltransferase 1   |
| TR355755 c5_g1_i2     | CH033_MOUSE | Up in Dom v. Con<br>(8.52; 0.0343)                                             | No change in males                                                                 | UPF0488 protein C8orf33 homolog                           |
| TR738415 c2_g2_i2     | CHSS3_MOUSE | Down in Dom v. Con<br>(-8.83; 0.0039)                                          | No change in males                                                                 | Chondroitin sulfate synthase 3                            |
| TR234188 c12_g4_i14   | CIP2A_MOUSE | Up in Dom v. Con<br>(5.94; 0.0015)                                             | No change in males                                                                 | Protein CIP2A                                             |
| TR727494 c14_g1_i2    | CNOT6_RAT   | No change in females                                                           | Up in Sub v. Dom<br>(7.29; 0.0004)                                                 | CCR4-NOT transcription complex subunit 6                  |
| TR752730 c3_g5_i11    | CNTN1_MOUSE | No change in females                                                           | Down in Sub v. Con<br>(-8.81; 0.0332)                                              | Contactin-1                                               |
| TR488658 c6_g7_i17    | COGA1_MOUSE | No change in females                                                           | Down in Dom v. Con<br>(-8.62; 0.02)                                                | Collagen alpha-1(XVI) chain                               |
| TR113730 c7_g2_i13    | CP250_MOUSE | Down in Dom v. Con<br>(-8.38; 0.0391)<br>Down in Sub v. Con<br>(-8.37; 0.0299) | No change in males                                                                 | Centrosome-associated protein CEP250                      |
| TR29058 c4_g1_i11     | CPEB1_MOUSE | No change in females                                                           | Up in Dom v. Sub<br>(9.1; 0.0002)                                                  | Cytoplasmic polyadenylation element-binding protein 1     |
| TR213815 c3_g1_i4     | CPSF7_MOUSE | No change in females                                                           | Up in Dom v. Sub<br>(8.49; 0.0155)                                                 | Cleavage and polyadenylation specificity factor subunit 7 |
| TR220715 c12_g1_i31   | CSF1R_MOUSE | No change in females                                                           | Up in Sub v. Dom<br>(9.31; 1.76e-05)                                               | Macrophage colony-stimulating factor 1 receptor           |
| TR224107 c4_g1_i12    | CSKI1_RAT   | No change in females                                                           | Up in Sub v. Dom<br>(8.35; 0.011)                                                  | Caskin-1                                                  |
| TR108616 c11_g7_i2    | CT194_MOUSE | Down in Sub v. Con<br>(-8.24; 0.0184)                                          | No change in males                                                                 | Uncharacterized protein C20orf194 homolog                 |
| TR194016 c0_g1_i3     | CUL3_RAT    | Down in Dom v. Con<br>(-9.66; 0.004)                                           | Down in Dom v. Con<br>(-11.38; 1.17e-09)<br>Down in Dom v. Sub<br>(-10.24; 0.0103) | Cullin-3                                                  |
| TR417587 c6_g2_i29    | CUL9_MOUSE  | Down in Sub v. Con<br>(-3.87; 0.0415)                                          | No change in males                                                                 | Cullin-9                                                  |
| TR417587 c6_g2_i22    | CUL9_MOUSE  | Up in Sub v. Dom<br>(8.58; 0.0175)                                             | No change in males                                                                 | Cullin-9                                                  |
| TR379494 c3_g4_i1     | CX056_MOUSE | No change in females                                                           | Up in Dom v. Con<br>(8.97; 0.0052)                                                 | UPF0428 protein CXorf56 homolog                           |
| TR139846 c14_g1_i6    | CXAR_MOUSE  | Down in Dom v. Con<br>(-8.93; 0.0004)                                          | No change in males                                                                 | Coxsackievirus and adenovirus receptor homolog            |
| TR690572 c15_g1_i5    | CYBP_MOUSE  | Up in Dom v. Sub<br>(9.49; 0.034)                                              | No change in males                                                                 | Calcyclin-binding protein                                 |

| Trinity Transcript ID | Uniprot ID  | Expression Change in Females<br>(log2FC; FDR)                           | Expression Change in Males<br>(log2FC; FDR)                                       | Gene                                                          |
|-----------------------|-------------|-------------------------------------------------------------------------|-----------------------------------------------------------------------------------|---------------------------------------------------------------|
| TR162 c4_g1_i10       | CYTSB_MOUSE | Up in Dom v. Sub<br>(8.67; 0.0023)                                      | No change in males                                                                | Cytospin-B                                                    |
| TR728257 c0_g1_i2     | CYYR1_MOUSE | No change in females                                                    | Down in Dom v. Con<br>(-6.68; 0.0022)                                             | Cysteine and tyrosine-rich protein 1                          |
| TR703960 c6_g2_i3     | DAPK3_MOUSE | Down in Sub v. Con<br>(-9.79; 0.0002)                                   | No change in males                                                                | Death-associated protein kinase 3                             |
| TR485954 c1_g1_i4     | DCC_MOUSE   | No change in females                                                    | Up in Dom v. Sub<br>(9.59; 0.0219)                                                | Netrin receptor DCC                                           |
| TR485954 c1_g1_i2     | DCC_RAT     | No change in females                                                    | Up in Dom v. Con<br>(9.47; 0.0004)<br>Up in Dom v. Sub<br>(9.68; 2.22e-06)        | Netrin receptor DCC                                           |
| TR485954 c1_g1_i7     | DCC_RAT     | Up in Dom v. Con<br>(9.3; 0.0002)<br>Up in Sub v. Con<br>(9.25; 0.0486) | No change in males                                                                | Netrin receptor DCC                                           |
| TR609750 c14_g1_i1    | DCE2_RAT    | No change in females                                                    | Up in Dom v. Con<br>(9.33; 0.0097)                                                | Glutamate decarboxylase 2                                     |
| TR324823 c20_g5_i9    | DDX58_MOUSE | Up in Sub v. Con<br>(8.17; 0.0262)                                      | No change in males                                                                | Probable ATP-dependent RNA helicase<br>DDX58                  |
| TR674200 c5_g4_i16    | DEN4C_MOUSE | Up in Sub v. Dom<br>(8.54; 0.0382)                                      | No change in males                                                                | DENN domain-containing protein 4C                             |
| TR447485 c3_g4_i23    | DGKB_MOUSE  | No change in females                                                    | Up in Sub v. Dom<br>(10.6; 1.16e-11)                                              | Diacylglycerol kinase beta                                    |
| TR447485 c3_g4_i9     | DGKB_MOUSE  | No change in females                                                    | Up in Sub v. Dom<br>(11.61; 3.03e-19)                                             | Diacylglycerol kinase beta                                    |
| TR447485 c3_g4_i27    | DGKB_RAT    | No change in females                                                    | Down in Dom v. Con<br>(-9.83; 0.0399)<br>Down in Dom v. Sub<br>(-11.15; 1.12e-17) | Diacylglycerol kinase beta                                    |
| TR447485 c3_g4_i1     | DGKB_RAT    | No change in females                                                    | Up in Dom v. Sub<br>(4.93; 0.0234)                                                | Diacylglycerol kinase beta                                    |
| TR309424 c5_g2_i22    | DGKZ_RAT    | No change in females                                                    | Up in Dom v. Sub<br>(8.06; 0.0411)                                                | Diacylglycerol kinase zeta                                    |
| TR608511 c3_g1_i7     | DHDDS_MOUSE | No change in females                                                    | Up in Dom v. Con<br>(8.6; 0.0141)                                                 | Dehydrololichyl diphosphate synthase<br>complex subunit Dhdds |
| TR407735 c6_g1_i14    | DHX9_MOUSE  | Down in Dom v. Con<br>(-9.55; 0.0348)                                   | No change in males                                                                | ATP-dependent RNA helicase A                                  |
| TR299047 c6_g1_i10    | DICER_CRIGR | No change in females                                                    | Up in Dom v. Con<br>(8.6; 0.0471)                                                 | Endoribonuclease Dicer                                        |
| TR496829 c10_g2_i8    | DNAI1_MOUSE | No change in females                                                    | Up in Sub v. Con<br>(9.71; 0.0001)<br>Up in Sub v. Dom<br>(10.02; 2.54e-09)       | Dynein intermediate chain 1, axonemal                         |

| Trinity Transcript ID | Uniprot ID  | Expression Change in Females<br>(log2FC; FDR)                            | Expression Change in Males<br>(log2FC; FDR)                                   | Gene                                                   |
|-----------------------|-------------|--------------------------------------------------------------------------|-------------------------------------------------------------------------------|--------------------------------------------------------|
| TR293624 c1_g1_i7     | DNJC5_RAT   | No change in females                                                     | Up in Dom v. Con<br>(8.43; 0.0472)                                            | DnaJ homolog subfamily C member 5                      |
| TR726665 c3_g2_i13    | DPOG1_RAT   | Up in Sub v. Dom<br>(9.2; 6.90e-05)                                      | No change in males                                                            | DNA polymerase subunit gamma-1                         |
| TR84647 c0_g2_i40     | DYH17_MOUSE | Up in Dom v. Con<br>(8.77; 0.002)                                        | No change in males                                                            | Dynein heavy chain 17, axonemal                        |
| TR408305 c8_g3_i4     | DYH7_RAT    | Up in Sub v. Dom<br>(9.27; 2.69e-05)                                     | No change in males                                                            | Dynein heavy chain 7, axonemal                         |
| TR234188 c12_g4_i7    | DZIP3_MOUSE | Down in Dom v. Con<br>(-9.03; 0.0003)                                    | No change in males                                                            | E3 ubiquitin-protein ligase DZIP3                      |
| TR743368 c3_g1_i13    | E41L1_RAT   | Up in Sub v. Con<br>(9.61; 0.0246)                                       | No change in males                                                            | Band 4.1-like protein 1                                |
| TR281012 c3_g1_i4     | E41L2_MOUSE | Up in Sub v. Con<br>(8.14; 0.0262)                                       | No change in males                                                            | Band 4.1-like protein 2                                |
| TR54670 c7_g4_i3      | E41LB_RAT   | No change in females                                                     | Up in Dom v. Con<br>(9.54; 0.0011)                                            | Band 4.1-like protein 4B                               |
| TR278365 c5_g1_i3     | EFC14_MOUSE | No change in females                                                     | Up in Dom v. Con<br>(9.66; 0.0471)                                            | EF-hand calcium-binding domain-containing protein 14   |
| TR719571 c0_g3_i1     | EHD4_MOUSE  | Up in Dom v. Con<br>(8.65; 0.0042)                                       | No change in males                                                            | EH domain-containing protein 4                         |
| TR121574 c6_g1_i18    | EME2_MOUSE  | No change in females                                                     | Up in Sub v. Con<br>(9.35; 0.0006)                                            | Probable crossover junction endonuclease EME2          |
| TR479052 c4_g2_i11    | EPHAA_MOUSE | No change in females                                                     | Up in Dom v. Con<br>(8.91; 0.0092)                                            | Ephrin type-A receptor 10                              |
| TR229077 c4_g3_i10    | EPS8_MOUSE  | Up in Dom v. Con<br>(8.06; 0.0475)                                       | No change in males                                                            | Epidermal growth factor receptor kinase substrate 8    |
| TR534844 c5_g7_i8     | EPT1_MOUSE  | No change in females                                                     | Down in Sub v. Con<br>(-8.99; 0.0048)                                         | Ethanolaminephosphotransferase 1                       |
| TR2061 c7_g3_i8       | EVI5_MOUSE  | Up in Dom v. Con<br>(9.45; 0.0446)<br>Up in Sub v. Con<br>(9.86; 0.0147) | No change in males                                                            | Ecotropic viral integration site 5 protein             |
| TR258166 c0_g1_i3     | EXPH5_MOUSE | Up in Dom v. Sub<br>(8.67; 0.0031)                                       | No change in males                                                            | Exophilin-5                                            |
| TR430745 c4_g1_i3     | F102A_MOUSE | No change in females                                                     | Down in Dom v. Con<br>(-8.76; 0.0076)                                         | Protein FAM102A                                        |
| TR343457 c9_g2_i1     | F117B_MOUSE | Up in Sub v. Con<br>(8.93; 0.0004)                                       | No change in males                                                            | Protein FAM117B                                        |
| TR501071 c2_g2_i2     | F179B_MOUSE | No change in females                                                     | Down in Dom v. Con<br>(-7.7; 0.0047)<br>Down in Dom v. Sub<br>(-6.83; 0.0109) | TOG array regulator of axonemal microtubules protein 1 |
| TR235840 c10_g2_i4    | F196B_MOUSE | No change in females                                                     | Up in Dom v. Con<br>(8.33; 0.0423)                                            | Protein FAM196B                                        |

| Trinity Transcript ID | Uniprot ID  | Expression Change in Females<br>(log <sub>2</sub> FC; FDR)                        | Expression Change in Males<br>(log <sub>2</sub> FC; FDR)                      | Gene                                              |
|-----------------------|-------------|-----------------------------------------------------------------------------------|-------------------------------------------------------------------------------|---------------------------------------------------|
| TR186263 c6_g1_i5     | FA57A_MOUSE | No change in females                                                              | Up in Dom v. Con<br>(8.57; 0.0274)                                            | Protein FAM57A                                    |
| TR372268 c7_g2_i9     | FA69B_RAT   | Up in Dom v. Sub<br>(9.02; 0.0007)                                                | No change in males                                                            | Protein FAM69B                                    |
| TR550033 c16_g1_i4    | FA76B_MOUSE | Up in Sub v. Con<br>(8.06; 0.0415)                                                | No change in males                                                            | Protein FAM76B                                    |
| TR743817 c1_g3_i7     | FAIM1_RAT   | No change in females                                                              | Up in Dom v. Sub<br>(8.22; 0.0196)                                            | Fas apoptotic inhibitory molecule 1               |
| TR31372 c0_g1_i13     | FAS_RAT     | No change in females                                                              | Down in Dom v. Con<br>(-8.51; 0.023)<br>Down in Dom v. Sub<br>(-8.72; 0.0051) | Fatty acid synthase                               |
| TR278137 c6_g3_i11    | FBW1B_MOUSE | No change in females                                                              | Up in Dom v. Con<br>(8.86; 0.0188)<br>Up in Sub v. Con<br>(8.96; 0.003)       | F-box/WD repeat-containing protein 11             |
| TR227061 c2_g1_i4     | FBX31_MOUSE | No change in females                                                              | Up in Dom v. Sub<br>(8.08; 2.62e-15)                                          | F-box only protein 31                             |
| TR672334 c3_g2_i10    | FBX41_MOUSE | Down in Sub v. Con<br>(-11.42; 2.10e-18)<br>Down in Sub v. Dom<br>(-9.31; 0.0005) | No change in males                                                            | F-box only protein 41                             |
| TR593350 c4_g1_i9     | FBXL2_MOUSE | No change in females                                                              | Up in Dom v. Con<br>(10.42; 0.0127)                                           | F-box/LRR-repeat protein 2                        |
| TR35243 c5_g1_i6      | FBXL5_MOUSE | No change in females                                                              | Down in Sub v. Con<br>(-8.54; 0.0289)                                         | F-box/LRR-repeat protein 5                        |
| TR123327 c5_g2_i10    | FCSD2_MOUSE | No change in females                                                              | Up in Dom v. Con<br>(8.71; 0.0141)                                            | F-BAR and double SH3 domains protein 2            |
| TR308572 c6_g5_i1     | FGD1_MOUSE  | Down in Dom v. Con<br>(-8.69; 0.0024)                                             | No change in males                                                            | FYVE, RhoGEF and PH domain-containing protein 1   |
| TR308572 c6_g5_i10    | FGD1_MOUSE  | Up in Dom v. Con<br>(8.72; 0.0026)                                                | No change in males                                                            | FYVE, RhoGEF and PH domain-containing protein 1   |
| TR690274 c3_g3_i7     | FGF12_RAT   | No change in females                                                              | Up in Dom v. Sub<br>(12.7; 0.002)                                             | Fibroblast growth factor 12                       |
| TR362729 c6_g3_i3     | FLNB_MOUSE  | Up in Dom v. Con<br>(10.3; 2.97e-08)<br>Up in Sub v. Con<br>(9.53; 0.0275)        | No change in males                                                            | Filamin-B                                         |
| TR641946 c0_g1_i23    | FLT3_MOUSE  | Up in Dom v. Sub<br>(8.37; 0.0124)                                                | No change in males                                                            | Receptor-type tyrosine-protein kinase FLT3        |
| TR693275 c10_g2_i15   | FND3A_MOUSE | No change in females                                                              | Up in Dom v. Sub<br>(8.17; 0.0219)                                            | Fibronectin type-III domain-containing protein 3A |
| TR693275 c10_g2_i13   | FND3A_MOUSE | Up in Sub v. Con<br>(10.14; 0.0077)                                               | No change in males                                                            | Fibronectin type-III domain-containing protein 3A |

| Trinity Transcript ID | Uniprot ID  | Expression Change in Females<br>(log2FC; FDR)                              | Expression Change in Males<br>(log2FC; FDR)                                   | Gene                                                                 |
|-----------------------|-------------|----------------------------------------------------------------------------|-------------------------------------------------------------------------------|----------------------------------------------------------------------|
| TR95663 c5_g3_i6      | FRS2_MOUSE  | Up in Dom v. Con<br>(8.7; 0.0032)                                          | No change in males                                                            | Fibroblast growth factor receptor substrate 2                        |
| TR372268 c4_g1_i7     | FXL17_MOUSE | Up in Dom v. Con<br>(8.46; 9.29e-21)<br>Up in Sub v. Con<br>(7.83; 0.0054) | No change in males                                                            | F-box/LRR-repeat protein 17                                          |
| TR644939 c6_g1_i16    | G6PD_CRIGR  | No change in females                                                       | Up in Dom v. Con<br>(9.96; 7.15e-06)<br>Up in Sub v. Con<br>(10.12; 2.49e-05) | Glucose-6-phosphate 1-dehydrogenase                                  |
| TR374171 c6_g4_i20    | GANC_MOUSE  | No change in females                                                       | Up in Sub v. Dom<br>(8.57; 0.012)                                             | Neutral alpha-glucosidase C                                          |
| TR741316 c0_g1_i4     | GBRA4_MOUSE | No change in females                                                       | Up in Dom v. Sub<br>(9.45; 0.0342)                                            | Gamma-aminobutyric acid receptor subunit alpha-4                     |
| TR336063 c11_g1_i2    | GD1L1_MOUSE | No change in females                                                       | Up in Sub v. Dom<br>(9.37; 4.03e-05)                                          | Ganglioside-induced differentiation-associated protein 1-like 1      |
| TR709728 c2_g2_i8     | GGACT_RAT   | Down in Sub v. Con<br>(-9.48; 5.35e-06)                                    | No change in males                                                            | Gamma-glutamylaminocyclotransferase                                  |
| TR709728 c2_g2_i1     | GGACT_RAT   | Up in Sub v. Con<br>(9.55; 5.61e-06)                                       | No change in males                                                            | Gamma-glutamylaminocyclotransferase                                  |
| TR237061 c5_g1_i3     | GHR_RAT     | Down in Sub v. Con<br>(-4.97; 0.0459)                                      | No change in males                                                            | Growth hormone receptor                                              |
| TR532823 c10_g6_i12   | GPBL1_RAT   | Up in Sub v. Con<br>(8.28; 0.02)                                           | No change in males                                                            | Vasculin-like protein 1                                              |
| TR49785 c4_g8_i7      | GPCP1_MOUSE | No change in females                                                       | Down in Dom v. Con<br>(-9.05; 0.0023)                                         | Glycerophosphocholine phosphodiesterase GPCPD1                       |
| TR651284 c1_g1_i1     | GPR45_MOUSE | No change in females                                                       | Up in Dom v. Con<br>(8.33; 0.0409)                                            | Probable G-protein coupled receptor 45                               |
| TR648315 c14_g3_i2    | GPSM1_RAT   | No change in females                                                       | Down in Dom v. Con<br>(-8.98; 0.0069)                                         | G-protein-signaling modulator 1                                      |
| TR737628 c5_g1_i9     | GPT11_MOUSE | No change in females                                                       | Up in Sub v. Dom<br>(8.36; 0.012)                                             | G patch domain-containing protein 11                                 |
| TR525908 c6_g2_i4     | GRAM3_MOUSE | No change in females                                                       | Up in Sub v. Dom<br>(9.18; 0.0002)                                            | GRAM domain-containing protein 2B                                    |
| TR563386 c9_g2_i4     | GRDN_MOUSE  | No change in females                                                       | Up in Sub v. Con<br>(4.24; 0.0116)                                            | Girdin                                                               |
| TR345044 c11_g4_i14   | GRIA2_MOUSE | No change in females                                                       | Up in Dom v. Con<br>(9.73; 0.0001)<br>Up in Sub v. Con<br>(9.02; 0.0043)      | Glutamate receptor 2                                                 |
| TR613585 c8_g2_i11    | GSE1_MOUSE  | No change in females                                                       | Up in Dom v. Sub<br>(8.06; 0.0411)                                            | Genetic suppressor element 1                                         |
| TR617876 c13_g2_i13   | GT2D1_MOUSE | No change in females                                                       | Up in Sub v. Con<br>(8.46; 0.0448)                                            | General transcription factor II-I repeat domain-containing protein 1 |

| Trinity Transcript ID | Uniprot ID  | Expression Change in Females<br>(log2FC; FDR)                                  | Expression Change in Males<br>(log2FC; FDR)                              | Gene                                                                 |
|-----------------------|-------------|--------------------------------------------------------------------------------|--------------------------------------------------------------------------|----------------------------------------------------------------------|
| TR617876 c13_g2_i10   | GT2D1_MOUSE | No change in females                                                           | Up in Sub v. Con<br>(9.09; 0.0079)                                       | General transcription factor II-I repeat domain-containing protein 1 |
| TR63596 c8_g3_i11     | GT2D2_MOUSE | No change in females                                                           | Up in Dom v. Con<br>(8.56; 0.0168)                                       | General transcription factor II-I repeat domain-containing protein 2 |
| TR620641 c13_g10_i3   | HA1L_MOUSE  | Up in Dom v. Con<br>(8.26; 0.0204)                                             | No change in males                                                       | H-2 class I histocompatibility antigen, L-D alpha chain              |
| TR361687 c9_g1_i4     | HDAC6_MOUSE | No change in females                                                           | Up in Sub v. Dom<br>(9.76; 4.55e-08)                                     | Histone deacetylase 6                                                |
| TR615411 c14_g3_i2    | HEBP1_MOUSE | Down in Dom v. Con<br>(-9.09; 0.0002)<br>Down in Sub v. Con<br>(-9.07; 0.0001) | No change in males                                                       | Heme-binding protein 1                                               |
| TR77719 c2_g7_i20     | HECW1_MOUSE | No change in females                                                           | Up in Dom v. Con<br>(8.23; 0.0463)                                       | E3 ubiquitin-protein ligase HECW1                                    |
| TR68087 c1_g1_i10     | HELZ2_MOUSE | Down in Sub v. Con<br>(-8.04; 0.0357)                                          | No change in males                                                       | Helicase with zinc finger domain 2                                   |
| TR625626 c0_g1_i3     | HINT3_RAT   | Up in Sub v. Dom<br>(9.94; 9.40e-09)                                           | Up in Sub v. Dom<br>(10.26; 8.09e-12)                                    | Histidine triad nucleotide-binding protein 3                         |
| TR660169 c1_g1_i3     | HMMR_RAT    | No change in females                                                           | Up in Dom v. Con<br>(8.31; 0.0367)<br>Up in Dom v. Sub<br>(8.53; 0.0046) | Hyaluronan-mediated motility receptor                                |
| TR198219 c16_g6_i2    | HNRDL_MOUSE | Up in Dom v. Con<br>(5.19; 0.0254)<br>Up in Dom v. Sub<br>(9.79; 2.47e-07)     | No change in males                                                       | Heterogeneous nuclear ribonucleoprotein D-like                       |
| TR594542 c8_g2_i12    | HPCA_RAT    | Up in Sub v. Con<br>(8.16; 0.0241)<br>Up in Sub in Dom<br>(8.1; 0.0304)        | No change in males                                                       | Neuron-specific calcium-binding protein hippocalcin                  |
| TR607386 c5_g5_i3     | HS12A_MOUSE | No change in females                                                           | Up in Dom v. Sub<br>(9.39; 0.0332)                                       | Heat shock 70 kDa protein 12A                                        |
| TR152480 c1_g2_i13    | HTR5A_MOUSE | No change in females                                                           | Up in Dom v. Con<br>(9.04; 0.0213)                                       | HEAT repeat-containing protein 5A                                    |
| TR154660 c8_g2_i2     | HTR5B_MOUSE | Up in Sub v. Con<br>(9.53; 4.48e-06)                                           | No change in males                                                       | HEAT repeat-containing protein 5B                                    |
| TR550516 c13_g2_i5    | IF4E_RAT    | No change in females                                                           | Up in Dom v. Sub<br>(7.38; 0.0001)                                       | Eukaryotic translation initiation factor 4E                          |
| TR88466 c1_g4_i11     | IFG15_MOUSE | Up in Dom v. Sub<br>(9.43; 3.35e-05)                                           | No change in males                                                       | Torsin-1A-interacting protein 2, isoform IFRG15                      |
| TR88466 c1_g4_i9      | IFG15_MOUSE | Up in Sub v. Con<br>(8.68; 0.0275)<br>Up in Sub v. Dom<br>(8.62; 0.0382)       | No change in males                                                       | Torsin-1A-interacting protein 2, isoform IFRG15                      |



| Trinity Transcript ID | Uniprot ID  | Expression Change in Females<br>(log2FC; FDR)                                       | Expression Change in Males<br>(log2FC; FDR)                                | Gene                                            |
|-----------------------|-------------|-------------------------------------------------------------------------------------|----------------------------------------------------------------------------|-------------------------------------------------|
| TR88466 c1_g4_i8      | IFG15_MOUSE | Up in Sub v. Dom<br>(8.23; 0.0382)                                                  | No change in males                                                         | Torsin-1A-interacting protein 2, isoform IFRG15 |
| TR704361 c0_g3_i6     | IGS11_MOUSE | No change in females                                                                | Down in Dom v. Con<br>(-9.04; 0.0471)                                      | Immunoglobulin superfamily member 11            |
| TR273156 c0_g1_i17    | IGSF1_MOUSE | No change in females                                                                | Up in Dom v. Sub<br>(8.01; 0.0416)                                         | Immunoglobulin superfamily member 1             |
| TR192311 c5_g3_i17    | IKZF4_MOUSE | No change in females                                                                | Up in Sub v. Con<br>(8.87; 0.0216)                                         | Zinc finger protein Eos                         |
| TR371089 c0_g2_i5     | IL1R1_RAT   | No change in females                                                                | Up in Dom v. Sub<br>(8.7; 0.0083)                                          | Interleukin-1 receptor type 1                   |
| TR371089 c0_g2_i1     | IL1R1_RAT   | No change in females                                                                | Up in Sub v. Dom<br>(8.26; 0.0233)                                         | Interleukin-1 receptor type 1                   |
| TR98898 c0_g1_i4      | IMDH2_CRIGR | Up in Dom v. Sub<br>(10.15; 4.77e-09)                                               | No change in males                                                         | Inosine-5'-monophosphate dehydrogenase 2        |
| TR98898 c0_g1_i3      | IMDH2_MOUSE | Down in Sub v. Con<br>(-9.86; 0.0175)<br>Down in Sub v. Dom<br>(-10.06; 1.27e-08)   | No change in males                                                         | Inosine-5'-monophosphate dehydrogenase 2        |
| TR737239 c13_g3_i8    | IP6K2_MOUSE | Down in Sub v. Con<br>(-9.36; 0.0366)                                               | No change in males                                                         | Inositol hexakisphosphate kinase 2              |
| TR260068 c11_g2_i15   | IPO9_MOUSE  | No change in females                                                                | Up in Sub v. Con<br>(8.81; 0.009)                                          | Importin-9                                      |
| TR776756 c11_g7_i1    | IRS1_MOUSE  | Up in Sub v. Dom<br>(9.19; 0.0013)                                                  | No change in males                                                         | Insulin receptor substrate 1                    |
| TR233613 c0_g1_i3     | ITM2C_RAT   | Down in Sub v. Con<br>(-7.36; 0.0044)                                               | Up in Dom v. Con<br>(9.18; 0.0003)<br>Up in Sub v. Con<br>(9.23; 4.15e-05) | Integral membrane protein 2C                    |
| TR233613 c0_g1_i4     | ITM2C_RAT   | Up in Dom v. Con<br>(10.25; 0.0018)                                                 | Up in Dom v. Con<br>(7.01; 0.0063)                                         | Integral membrane protein 2C                    |
| TR495590 c6_g1_i12    | ITSN2_MOUSE | Down in Dom v. Con<br>(-9.42; 1.41e-05)<br>Down in Dom v. Sub<br>(-10.19; 6.52e-11) | No change in males                                                         | Intersectin-2                                   |
| TR463575 c11_g2_i10   | JPH1_MOUSE  | Down in Sub v. Con<br>(-9.63; 1.31e-06)                                             | Up in Sub v. Dom<br>(5.59; 0.0407)                                         | Junctophilin-1                                  |
| TR220853 c0_g1_i7     | K2022_MOUSE | No change in females                                                                | Up in Sub v. Con<br>(8.61; 0.0245)                                         | Neurite extension and migration factor          |
| TR220853 c0_g1_i2     | K2022_MOUSE | Up in Dom v. Con<br>(9.16; 0.0002)                                                  | No change in males                                                         | Neurite extension and migration factor          |
| TR148994 c0_g2_i6     | KAD4_RAT    | Down in Sub v. Con<br>(-9.41; 0.0328)<br>Down in Sub v. Dom<br>(-9.41; 0.0395)      | No change in males                                                         | Adenylate kinase 4, mitochondrial               |

| Trinity Transcript ID | Uniprot ID  | Expression Change in Females<br>(log2FC; FDR)                                  | Expression Change in Males<br>(log2FC; FDR)                              | Gene                                                 |
|-----------------------|-------------|--------------------------------------------------------------------------------|--------------------------------------------------------------------------|------------------------------------------------------|
| TR750954 c3_g3_i3     | KALRN_MOUSE | No change in females                                                           | Up in Sub v. Dom<br>(9.01; 0.0003)                                       | Kalirin                                              |
| TR130077 c10_g2_i15   | KBTB4_MOUSE | Up in Dom v. Con<br>(8.11; 0.0423)<br>Up in Sub v. Con<br>(9.09; 0.0001)       | Down in Dom v. Con<br>(-9.22; 0.0021)                                    | Kelch repeat and BTB domain-containing protein 4     |
| TR339072 c3_g3_i12    | KCNA2_RAT   | Up in Sub v. Dom<br>(9.52; 1.41e-05)                                           | No change in males                                                       | Potassium voltage-gated channel subfamily A member 2 |
| TR73160 c7_g1_i7      | KCNH3_RAT   | No change in females                                                           | Down in Sub v. Con<br>(-8.45; 0.0459)                                    | Potassium voltage-gated channel subfamily H member 3 |
| TR12653 c6_g2_i17     | KCNT2_RAT   | No change in females                                                           | Up in Sub v. Dom<br>(9.72; 0.0162)                                       | Potassium channel subfamily T member 2               |
| TR580703 c5_g1_i2     | KCTD7_MOUSE | No change in females                                                           | Up in Dom v. Con<br>(9.08; 0.0027)<br>Up in Sub v. Con<br>(9.19; 0.0019) | BTB/POZ domain-containing protein KCTD7              |
| TR10245 c6_g2_i22     | KDM3A_MOUSE | Down in Dom v. Con<br>(-8.35; 0.0147)<br>Down in Dom v. Sub<br>(-8.68; 0.0032) | No change in males                                                       | Lysine-specific demethylase 3A                       |
| TR214512 c7_g2_i21    | KDM6B_MOUSE | No change in females                                                           | Up in Sub v. Con<br>(9.24; 0.0008)                                       | Lysine-specific demethylase 6B                       |
| TR214512 c7_g2_i22    | KDM6B_MOUSE | Up in Sub v. Con<br>(8.33; 0.0179)<br>Up in Sub v. Dom<br>(8.27; 0.0221)       | No change in males                                                       | Lysine-specific demethylase 6B                       |
| TR621495 c1_g3_i2     | KI13A_MOUSE | Down in Sub v. Con<br>(-9.05; 0.0017)                                          | No change in males                                                       | Kinesin-like protein KIF13A                          |
| TR20782 c12_g5_i12    | KIFC3_MOUSE | Up in Dom v. Con<br>(8.09; 0.0446)                                             | No change in males                                                       | Kinesin-like protein KIFC3                           |
| TR67005 c18_g1_i10    | KLC1_RAT    | No change in females                                                           | Up in Sub v. Dom<br>(9.75; 0.0159)                                       | Kinesin light chain 1                                |
| TR67005 c18_g1_i27    | KLC1_RAT    | No change in females                                                           | Up in Sub v. Dom<br>(10.52; 0.003)                                       | Kinesin light chain 1                                |
| TR383901 c2_g1_i19    | KLH17_RAT   | No change in females                                                           | Up in Dom v. Sub<br>(7; 0.0016)                                          | Kelch-like protein 17                                |
| TR463198 c6_g4_i11    | KMT2A_MOUSE | Up in Dom v. Sub<br>(8.11; 0.0382)                                             | No change in males                                                       | Histone-lysine N-methyltransferase 2A                |
| TR277869 c4_g1_i3     | KMT2D_MOUSE | No change in females                                                           | Up in Dom v. Sub<br>(9.5; 0.0281)                                        | Histone-lysine N-methyltransferase 2D                |
| TR335446 c0_g2_i19    | KPYM_RAT    | No change in females                                                           | Up in Dom v. Con<br>(9.11; 0.0141)                                       | Pyruvate kinase PKM                                  |
| TR335446 c0_g2_i2     | KPYM_RAT    | Up in Dom v. Con<br>(6.2; 0.039)                                               | No change in males                                                       | Pyruvate kinase PKM                                  |

| Trinity Transcript ID | Uniprot ID  | Expression Change in Females<br>(log2FC; FDR)                                     | Expression Change in Males<br>(log2FC; FDR) | Gene                                                                         |
|-----------------------|-------------|-----------------------------------------------------------------------------------|---------------------------------------------|------------------------------------------------------------------------------|
| TR100414 c0_g2_i2     | KRCC1_MOUSE | No change in females                                                              | Up in Sub v. Con<br>(8.74; 0.0481)          | Lysine-rich coiled-coil protein 1                                            |
| TR480375 c2_g1_i7     | LAMA1_MOUSE | Down in Sub v. Con<br>(-9.83; 0.0155)                                             | No change in males                          | Laminin subunit alpha-1                                                      |
| TR480375 c2_g1_i5     | LAMA1_MOUSE | No change in females                                                              | Up in Sub v. Con<br>(8.57; 0.0459)          | Laminin subunit alpha-1                                                      |
| TR101141 c1_g2_i8     | LAMA2_MOUSE | Down in Dom v. Con<br>(-9.23; 0.0007)<br>Down in Dom v. Sub<br>(-8.2; 0.0204)     | No change in males                          | Laminin subunit alpha-2                                                      |
| TR180895 c4_g3_i10    | LDLR_CRIGR  | No change in females                                                              | Down in Dom v. Con<br>(-9.3; 0.006)         | Low-density lipoprotein receptor                                             |
| TR323008 c0_g3_i1     | LGI3_MOUSE  | Up in Sub v. Dom<br>(8.6; 0.0031)                                                 | No change in males                          | Leucine-rich repeat LGI family member 3                                      |
| TR68341 c0_g1_i3      | LIPL_RAT    | No change in females                                                              | Up in Sub v. Con<br>(8.95; 0.0047)          | Lipoprotein lipase                                                           |
| TR99902 c1_g2_i24     | LMTK1_MOUSE | No change in females                                                              | Up in Dom v. Sub<br>(8.89; 0.0004)          | Serine/threonine-protein kinase LMTK1                                        |
| TR390042 c1_g3_i9     | LONF3_MOUSE | Down in Sub v. Con<br>(-12.15; 2.07e-13)<br>Down in Sub v. Dom<br>(-9.71; 0.0266) | No change in males                          | LON peptidase N-terminal domain and RING finger protein 3                    |
| TR376100 c10_g2_i2    | LPPR4_MOUSE | No change in females                                                              | Down in Dom v. Con<br>(-9.02; 0.0049)       | Phospholipid phosphatase-related protein type 4                              |
| TR198870 c12_g4_i7    | LRCH1_MOUSE | No change in females                                                              | Up in Sub v. Con<br>(9.56; 0.0002)          | Leucine-rich repeat and calponin homology domain-containing protein 1        |
| TR198870 c12_g4_i12   | LRCH1_MOUSE | Up in Sub v. Dom<br>(6.67; 0.0169)                                                | No change in males                          | Leucine-rich repeat and calponin homology domain-containing protein 1        |
| TR181123 c0_g1_i6     | LRCH4_MOUSE | Up in Dom v. Con<br>(8.47; 0.0361)                                                | No change in males                          | Leucine-rich repeat and calponin homology domain-containing protein 4        |
| TR35563 c2_g2_i7      | LRFN5_MOUSE | Up in Dom v. Con<br>(9.19; 0.0003)                                                | No change in males                          | Leucine-rich repeat and fibronectin type-III domain-containing protein 5     |
| TR5357 c9_g3_i3       | LSM8_MOUSE  | No change in females                                                              | Down in Dom v. Con<br>(-9.75; 0.042)        | U6 snRNA-associated Sm-like protein LSM8                                     |
| TR5357 c9_g3_i11      | LSM8_MOUSE  | No change in females                                                              | Up in Dom v. Sub<br>(9.7; 0.019)            | U6 snRNA-associated Sm-like protein LSM8                                     |
| TR372441 c0_g3_i5     | M3K6_MOUSE  | No change in females                                                              | Up in Dom v. Con<br>(8.37; 0.0286)          | Mitogen-activated protein kinase kinase kinase 6                             |
| TR671122 c6_g9_i31    | MAGI2_MOUSE | Up in Sub v. Con<br>(8.73; 0.0262)                                                | No change in males                          | Membrane-associated guanylate kinase, WW and PDZ domain-containing protein 2 |
| TR707668 c3_g1_i4     | MAP1S_MOUSE | No change in females                                                              | Down in Sub v. Con<br>(-12.16; 0.0014)      | Microtubule-associated protein 1S                                            |
| TR707668 c3_g1_i6     | MAP1S_MOUSE | No change in females                                                              | Down in Sub v. Con<br>(-10.91; 0.0123)      | Microtubule-associated protein 1S                                            |

| Trinity Transcript ID | Uniprot ID  | Expression Change in Females<br>(log2FC; FDR)                                    | Expression Change in Males<br>(log2FC; FDR)                                 | Gene                                                                    |
|-----------------------|-------------|----------------------------------------------------------------------------------|-----------------------------------------------------------------------------|-------------------------------------------------------------------------|
| TR504027 c3_g6_i4     | MAP4_MOUSE  | Down in Sub v. Con<br>(-11.05; 0.0013)<br>Down in Sub v. Dom<br>(-11.72; 0.0005) | No change in males                                                          | Microtubule-associated protein 4                                        |
| TR51000 c1_g4_i5      | MAP6_MOUSE  | No change in females                                                             | Up in Sub v. Con<br>(9.04; 0.0027)                                          | Microtubule-associated protein 6                                        |
| TR754933 c8_g3_i8     | MARE3_RAT   | Down in Sub v. Con<br>(-11.76; 0.0004)<br>Down in Sub v. Dom<br>(-11.94; 0.0004) | No change in males                                                          | Microtubule-associated protein RP/EB family member 3                    |
| TR351367 c3_g1_i2     | MARH1_MOUSE | Down in Sub v. Con<br>(-8.58; 0.0061)                                            | No change in males                                                          | E3 ubiquitin-protein ligase MARCH1                                      |
| TR406133 c1_g1_i5     | MB12B_MOUSE | Up in Dom v. Sub<br>(5.76; 0.0005)                                               | No change in males                                                          | Multivesicular body subunit 12B                                         |
| TR91087 c3_g4_i1      | MBD1_MOUSE  | Down in Dom v. Con<br>(-8.57; 0.0141)                                            | No change in males                                                          | Methyl-CpG-binding domain protein 1                                     |
| TR209478 c7_g6_i11    | MBNL2_RAT   | No change in females                                                             | Down in Dom v. Con<br>(-10.28; 8.99e-08)                                    | Muscleblind-like protein 2                                              |
| TR112862 c9_g2_i1     | MDGA2_RAT   | Up in Dom v. Con<br>(10.02; 0.0152)<br>Up in Dom v. Sub<br>(9.94; 0.0128)        | Down in Sub v. Con<br>(-9.69; 0.04)<br>Down in Sub v. Dom<br>(-9.99; 0.011) | MAM domain-containing glycosylphosphatidylinositol anchor protein 2     |
| TR449005 c6_g1_i17    | MED12_MOUSE | Up in Sub v. Con<br>(8.12; 0.0407)                                               | No change in males                                                          | Mediator of RNA polymerase II transcription subunit 12                  |
| TR195400 c2_g1_i21    | MEGF8_MOUSE | Up in Sub v. Con<br>(9.72; 0.0184)                                               | No change in males                                                          | Multiple epidermal growth factor-like domains protein 8                 |
| TR751996 c1_g3_i12    | MEP1A_RAT   | Down in Dom v. Con<br>(-8.5; 0.0147)                                             | Up in Sub v. Con<br>(8.47; 0.0284)                                          | Meprin A subunit alpha                                                  |
| TR525714 c1_g2_i4     | METH_RAT    | No change in females                                                             | Up in Dom v. Sub<br>(9; 0.0004)                                             | Methionine synthase                                                     |
| TR583033 c0_g1_i2     | MFHA1_MOUSE | No change in females                                                             | Up in Sub v. Con<br>(8.89; 0.0123)                                          | Malignant fibrous histiocytoma-amplified sequence 1 homolog             |
| TR109397 c8_g3_i2     | MFSD6_MOUSE | Up in Dom v. Con<br>(8.27; 0.0343)                                               | No change in males                                                          | Major facilitator superfamily domain-containing protein 6               |
| TR90995 c7_g1_i4      | MGAP_MOUSE  | Up in Sub v. Dom<br>(8.32; 0.0111)                                               | No change in males                                                          | MAX gene-associated protein                                             |
| TR225465 c13_g3_i8    | MGT5A_CRIGR | Down in Sub v. Con<br>(-8.66; 0.0017)                                            | No change in males                                                          | Alpha-1,6-mannosylglycoprotein 6-beta-N-acetylglucosaminyltransferase A |
| TR225465 c13_g3_i2    | MGT5A_CRIGR | No change in females                                                             | Up in Dom v. Sub<br>(9.6; 0.0288)                                           | Alpha-1,6-mannosylglycoprotein 6-beta-N-acetylglucosaminyltransferase A |
| TR645064 c5_g4_i19    | MICA3_MOUSE | Up in Sub v. Dom<br>(9.09; 0.0004)                                               | No change in males                                                          | [F-actin]-monooxygenase MICAL3                                          |
| TR270798 c7_g4_i12    | MIO_MOUSE   | No change in females                                                             | Up in Sub v. Con<br>(9.14; 0.0011)                                          | GATOR complex protein MIOS                                              |

| Trinity Transcript ID | Uniprot ID  | Expression Change in Females<br>(log2FC; FDR)                                   | Expression Change in Males<br>(log2FC; FDR) | Gene                                                                         |
|-----------------------|-------------|---------------------------------------------------------------------------------|---------------------------------------------|------------------------------------------------------------------------------|
| TR512995 c0_g2_i4     | MK04_MOUSE  | Up in Sub v. Con<br>(10.07; 2.04e-08)                                           | No change in males                          | Mitogen-activated protein kinase 4                                           |
| TR113730 c6_g2_i7     | MKL1_MOUSE  | No change in females                                                            | Up in Dom v. Con<br>(9.32; 0.0011)          | MKL/myocardin-like protein 1                                                 |
| TR225339 c11_g3_i8    | MO4L2_RAT   | Down in Sub v. Con<br>(-9.79; 3.36e-06)<br>Down in Sub v. Dom<br>(-9.9; 0.0107) | No change in males                          | Mortality factor 4-like protein 2                                            |
| TR307270 c13_g5_i8    | MTMRC_MOUSE | Down in Sub v. Con<br>(-8.24; 0.0459)                                           | No change in males                          | Myotubularin-related protein 12                                              |
| TR535379 c7_g1_i1     | MXI1_RAT    | Down in Sub v. Con<br>(-9.95; 4.80e-09)                                         | No change in males                          | Max-interacting protein 1                                                    |
| TR20412 c18_g1_i9     | N42L1_MOUSE | Up in Dom v. Sub<br>(9.05; 0.0014)                                              | Up in Dom v. Con<br>(8.83; 0.0086)          | NEDD4-binding protein 2-like 1                                               |
| TR186309 c3_g1_i2     | NAA50_MOUSE | Up in Dom v. Sub<br>(8.61; 0.0172)                                              | No change in males                          | N-alpha-acetyltransferase 50                                                 |
| TR588175 c7_g3_i3     | NAB1_MESAU  | Down in Sub v. Con<br>(-9.01; 0.0004)                                           | No change in males                          | NGFI-A-binding protein 1                                                     |
| TR399252 c3_g4_i3     | NAB2_MOUSE  | Up in Dom v. Con<br>(8.2; 0.0343)                                               | No change in males                          | NGFI-A-binding protein 2                                                     |
| TR180180 c8_g3_i13    | NBEL2_MOUSE | Up in Sub v. Dom<br>(8.84; 0.001)                                               | No change in males                          | Neurobeachin-like protein 2                                                  |
| TR195037 c5_g1_i3     | NDUAA_RAT   | No change in females                                                            | Up in Dom v. Sub<br>(9.18; 0.0003)          | NADH dehydrogenase [ubiquinone] 1 alpha subcomplex subunit 10, mitochondrial |
| TR389055 c11_g1_i19   | NEK9_MOUSE  | Up in Sub v. Dom<br>(9.8; 1.40e-05)                                             | No change in males                          | Serine/threonine-protein kinase Nek9                                         |
| TR687290 c7_g2_i5     | NELL2_RAT   | Down in Dom v. Con<br>(-8.66; 0.0025)                                           | No change in males                          | Protein kinase C-binding protein NELL2                                       |
| TR755075 c0_g1_i15    | NEUL4_MOUSE | No change in females                                                            | Up in Dom v. Con<br>(8.91; 0.0073)          | Neuralized-like protein 4                                                    |
| TR607309 c0_g2_i3     | NEUR1_MOUSE | No change in females                                                            | Down in Dom v. Con<br>(-9.42; 0.0006)       | Sialidase-1                                                                  |
| TR545769 c4_g2_i6     | NFAT5_RAT   | Up in Dom v. Con<br>(9.6; 1.24e-05)                                             | No change in males                          | Nuclear factor of activated T-cells 5                                        |
| TR53098 c2_g6_i13     | NFYB_RAT    | Down in Sub v. Con<br>(-8.58; 0.007)                                            | No change in males                          | Nuclear transcription factor Y subunit beta                                  |
| TR236179 c2_g2_i3     | NIPA1_MOUSE | Down in Sub v. Con<br>(-10.91; 0.0017)                                          | Up in Dom v. Sub<br>(8.21; 0.0253)          | Magnesium transporter NIPA1                                                  |
| TR607032 c0_g1_i5     | NK3R_MOUSE  | Up in Dom v. Sub<br>(9.23; 2.69e-05)                                            | No change in males                          | Neuromedin-K receptor                                                        |
| TR607032 c0_g1_i2     | NK3R_MOUSE  | Up in Sub v. Dom<br>(9.18; 5.46e-05)                                            | No change in males                          | Neuromedin-K receptor                                                        |

| Trinity Transcript ID | Uniprot ID  | Expression Change in Females<br>(log2FC; FDR)                                  | Expression Change in Males<br>(log2FC; FDR)                                    | Gene                                                                    |
|-----------------------|-------------|--------------------------------------------------------------------------------|--------------------------------------------------------------------------------|-------------------------------------------------------------------------|
| TR632261 c4_g1_i9     | NKTR_MOUSE  | Down in Sub v. Con<br>(-9.49; 0.0341)                                          | No change in males                                                             | NK-tumor recognition protein                                            |
| TR524789 c1_g4_i17    | NMT2_MOUSE  | Up in Sub v. Dom<br>(9.19; 0.0005)                                             | Down in Sub v. Con<br>(-9.02; 0.0123)                                          | Glycylpeptide N-tetradecanoyltransferase 2                              |
| TR24607 c0_g1_i3      | NOE3_RAT    | Up in Dom v. Con<br>(10.61; 0.0037)<br>Up in Sub v. Con<br>(9.53; 0.0264)      | No change in males                                                             | Noelin-3                                                                |
| TR60453 c4_g2_i6      | NOP14_MOUSE | Up in Dom v. Con<br>(8.07; 0.0355)                                             | No change in males                                                             | Nucleolar protein 14                                                    |
| TR60453 c4_g2_i15     | NOP14_MOUSE | Up in Dom v. Con<br>(9.14; 8.33e-05)                                           | No change in males                                                             | Nucleolar protein 14                                                    |
| TR297293 c1_g3_i13    | NOS3_MOUSE  | No change in females                                                           | Up in Dom v. Con<br>(8.42; 0.0255)                                             | Nitric oxide synthase, endothelial                                      |
| TR725436 c1_g2_i6     | NPHP1_MOUSE | Up in Sub v. Con<br>(9.77; 0.0174)                                             | No change in males                                                             | Nephrocystin-1                                                          |
| TR411818 c1_g1_i10    | NRP1_MOUSE  | No change in females                                                           | Up in Dom v. Sub<br>(10.4; 0.0035)                                             | Neuropilin-1                                                            |
| TR417502 c2_g1_i5     | NSMA_RAT    | No change in females                                                           | Up in Sub v. Con<br>(8.45; 0.0459)                                             | Sphingomyelin phosphodiesterase 2                                       |
| TR475792 c2_g2_i16    | NU214_MOUSE | Up in Sub v. Con<br>(8.21; 0.0288)                                             | No change in males                                                             | Nuclear pore complex protein Nup214                                     |
| TR442682 c7_g1_i8     | NUP50_RAT   | No change in females                                                           | Down in Sub v. Con<br>(-9.29; 0.0015)<br>Down in Sub v. Dom<br>(-10.24; 0.012) | Nuclear pore complex protein Nup50                                      |
| TR167074 c10_g1_i6    | NUP93_RAT   | Up in Sub v. Dom<br>(8.52; 0.0436)                                             | No change in males                                                             | Nuclear pore complex protein Nup93                                      |
| TR87431 c3_g1_i2      | NWD2_MOUSE  | Up in Dom v. Con<br>(10.57; 0.0037)<br>Up in Dom v. Sub<br>(10.49; 0.0028)     | No change in males                                                             | NACHT and WD repeat domain-containing protein 2                         |
| TR508960 c3_g2_i9     | ODO1_RAT    | Down in Sub v. Con<br>(-8.91; 0.0004)<br>Down in Sub v. Dom<br>(-8.29; 0.0304) | No change in males                                                             | 2-oxoglutarate dehydrogenase, mitochondrial                             |
| TR667186 c0_g2_i4     | OGFD2_MOUSE | No change in females                                                           | Up in Dom v. Con<br>(8.39; 0.0274)                                             | 2-oxoglutarate and iron-dependent oxygenase domain-containing protein 2 |
| TR620383 c0_g7_i9     | OSBL6_MOUSE | Up in Dom v. Con<br>(8.46; 0.0127)<br>Up in Dom v. Sub<br>(8.38; 0.0124)       | No change in males                                                             | Oxysterol-binding protein-related protein 6                             |
| TR620383 c0_g7_i6     | OSBL6_MOUSE | Up in Dom v. Sub<br>(9.3; 0.0003)                                              | No change in males                                                             | Oxysterol-binding protein-related protein 6                             |

| Trinity Transcript ID | Uniprot ID  | Expression Change in Females<br>(log2FC; FDR)                                    | Expression Change in Males<br>(log2FC; FDR) | Gene                                                                      |
|-----------------------|-------------|----------------------------------------------------------------------------------|---------------------------------------------|---------------------------------------------------------------------------|
| TR620383 c0_g7_i15    | OSBL6_MOUSE | Up in Sub v. Dom<br>(9.62; 3.18e-05)                                             | No change in males                          | Oxysterol-binding protein-related protein 6                               |
| TR281026 c11_g4_i16   | OSBL8_MOUSE | No change in females                                                             | Up in Sub v. Dom<br>(8.12; 0.0317)          | Oxysterol-binding protein-related protein 8                               |
| TR259645 c2_g2_i4     | P5CR2_MOUSE | No change in females                                                             | Up in Sub v. Dom<br>(8.3; 0.0248)           | Pyrraline-5-carboxylate reductase 2                                       |
| TR134896 c6_g2_i3     | PACR_MOUSE  | Up in Sub v. Dom<br>(9.91; 0.0131)                                               | No change in males                          | Pituitary adenylate cyclase-activating polypeptide type I receptor        |
| TR19880 c8_g6_i12     | PAK2_RAT    | Down in Sub v. Con<br>(-9.17; 6.11e-05)<br>Down in Sub v. Dom<br>(-8.89; 0.0005) | No change in males                          | Serine/threonine-protein kinase PAK 2                                     |
| TR19880 c8_g6_i8      | PAK2_RAT    | Up in Sub v. Con<br>(8.19; 5.25e-08)                                             | Up in Dom v. Sub<br>(6.14; 0.0095)          | Serine/threonine-protein kinase PAK 2                                     |
| TR451580 c1_g2_i8     | PAPOG_MOUSE | Down in Sub v. Con<br>(-5.28; 0.035)                                             | No change in males                          | Poly(A) polymerase gamma                                                  |
| TR451580 c1_g2_i6     | PAPOG_MOUSE | No change in females                                                             | Up in Dom v. Sub<br>(9.08; 0.0006)          | Poly(A) polymerase gamma                                                  |
| TR207093 c0_g1_i28    | PCD16_MOUSE | No change in females                                                             | Up in Dom v. Con<br>(8.62; 0.015)           | Protocadherin-16                                                          |
| TR284008 c0_g1_i4     | PCX3_MOUSE  | No change in females                                                             | Up in Dom v. Con<br>(8.33; 0.0366)          | Pecanex-like protein 3                                                    |
| TR652575 c6_g1_i4     | PCY1B_RAT   | Up in Dom v. Con<br>(8.4; 0.0152)                                                | No change in males                          | Choline-phosphate cytidyltransferase B                                    |
| TR50213 c1_g1_i9      | PDE1B_RAT   | Up in Sub v. Con<br>(8.62; 0.0066)                                               | No change in males                          | Calcium/calmodulin-dependent 3',5'-cyclic nucleotide phosphodiesterase 1B |
| TR692604 c8_g2_i21    | PDE1C_RAT   | No change in females                                                             | Up in Sub v. Dom<br>(8.28; 0.0281)          | Calcium/calmodulin-dependent 3',5'-cyclic nucleotide phosphodiesterase 1C |
| TR308413 c8_g3_i12    | PF21A_MOUSE | Down in Dom v. Con<br>(-9.41; 2.76e-05)                                          | No change in males                          | PHD finger protein 21A                                                    |
| TR120662 c2_g2_i24    | PFKAM_MOUSE | Down in Sub v. Con<br>(-10.19; 3.66e-08)                                         | Up in Sub v. Con<br>(9.94; 3.78e-05)        | ATP-dependent 6-phosphofructokinase, muscle type                          |
| TR764800 c5_g1_i25    | PGP_MOUSE   | Up in Sub v. Dom<br>(8.88; 0.0005)                                               | No change in males                          | Glycerol-3-phosphate phosphatase                                          |
| TR78315 c7_g1_i11     | PHF12_MOUSE | No change in females                                                             | Up in Dom v. Sub<br>(8.93; 0.0003)          | PHD finger protein 12                                                     |
| TR396488 c0_g3_i21    | PHF2_MOUSE  | No change in females                                                             | Up in Dom v. Con<br>(10.02; 1.90e-05)       | Lysine-specific demethylase PHF2                                          |
| TR211358 c6_g5_i1     | PHTF1_MOUSE | No change in females                                                             | Up in Dom v. Sub<br>(10.09; 0.008)          | Putative homeodomain transcription factor 1                               |
| TR211358 c6_g5_i7     | PHTF1_MOUSE | No change in females                                                             | Up in Sub v. Dom<br>(8.67; 0.0148)          | Putative homeodomain transcription factor 1                               |

| Trinity Transcript ID | Uniprot ID  | Expression Change in Females<br>(log2FC; FDR)                            | Expression Change in Males<br>(log2FC; FDR)                              | Gene                                                                          |
|-----------------------|-------------|--------------------------------------------------------------------------|--------------------------------------------------------------------------|-------------------------------------------------------------------------------|
| TR216650 c8_g4_i2     | PLAP_RAT    | Up in Sub v. Con<br>(9.05; 0.0017)<br>Up in Sub v. Dom<br>(8.99; 0.0022) | No change in males                                                       | Phospholipase A-2-activating protein                                          |
| TR79717 c0_g1_i11     | PLCB1_RAT   | Down in Sub v. Con<br>(-9.76; 0.0179)                                    | No change in males                                                       | 1-phosphatidylinositol 4,5-bisphosphate phosphodiesterase beta-1              |
| TR79717 c0_g1_i1      | PLCB1_RAT   | Down in Sub v. Con<br>(-9.41; 0.0363)                                    | No change in males                                                       | 1-phosphatidylinositol 4,5-bisphosphate phosphodiesterase beta-1              |
| TR84722 c8_g2_i17     | PLEC_CRIGR  | No change in females                                                     | Up in Dom v. Con<br>(9.05; 0.0184)<br>Up in Sub v. Con<br>(9.54; 0.0003) | Plectin                                                                       |
| TR84722 c8_g2_i10     | PLEC_CRIGR  | No change in females                                                     | Up in Sub v. Con<br>(11.4; 3.62e-12)                                     | Plectin                                                                       |
| TR554121 c4_g1_i12    | PLPL7_MOUSE | No change in females                                                     | Up in Dom v. Sub<br>(8.17; 0.0462)                                       | Patatin-like phospholipase domain-containing protein 7                        |
| TR374955 c3_g1_i8     | PLPL8_MOUSE | No change in females                                                     | Up in Sub v. Con<br>(9.42; 0.0006)                                       | Calcium-independent phospholipase A2-gamma                                    |
| TR732934 c3_g2_i19    | PLXB1_MOUSE | No change in females                                                     | Up in Sub v. Dom<br>(8.59; 0.003)                                        | Plexin-B1                                                                     |
| TR728427 c16_g5_i3    | PP2BA_RAT   | No change in females                                                     | Up in Dom v. Con<br>(10.44; 5.10e-07)                                    | Serine/threonine-protein phosphatase 2B catalytic subunit alpha isoform       |
| TR492399 c10_g2_i4    | PP2BB_MOUSE | Up in Sub v. Con<br>(9.31; 0.0415)                                       | No change in males                                                       | Serine/threonine-protein phosphatase 2B catalytic subunit beta isoform        |
| TR355760 c15_g2_i1    | PPME1_RAT   | No change in females                                                     | Up in Dom v. Con<br>(8.21; 0.0471)                                       | Protein phosphatase methylesterase 1                                          |
| TR765050 c8_g1_i8     | PR40A_MOUSE | No change in females                                                     | Up in Dom v. Con<br>(9.93; 0.0059)                                       | Pre-mRNA-processing factor 40 homolog A                                       |
| TR488977 c4_g2_i4     | PRGC1_RAT   | Up in Dom v. Sub<br>(10.06; 1.29e-08)                                    | No change in males                                                       | Peroxisome proliferator-activated receptor gamma coactivator 1-alpha          |
| TR701529 c3_g1_i2     | PRKRA_MOUSE | Up in Sub v. Dom<br>(9.65; 0.0327)                                       | No change in males                                                       | Interferon-inducible double-stranded RNA-dependent protein kinase activator A |
| TR85359 c0_g1_i2      | PRP4B_RAT   | No change in females                                                     | Down in Dom v. Con<br>(-10.37; 2.26e-06)                                 | Serine/threonine-protein kinase PRP4 homolog                                  |
| TR242744 c4_g6_i9     | PRP6_MOUSE  | Up in Sub v. Con<br>(9.79; 3.30e-07)                                     | No change in males                                                       | Pre-mRNA-processing factor 6                                                  |
| TR196275 c3_g1_i5     | PRP8_MOUSE  | Up in Sub v. Con<br>(8.23; 0.0272)                                       | No change in males                                                       | Pre-mRNA-processing-splicing factor 8                                         |
| TR241967 c14_g2_i4    | PSA2_RAT    | Up in Dom v. Con<br>(8.25; 0.0311)                                       | No change in males                                                       | Proteasome subunit alpha type-2                                               |
| TR186395 c11_g3_i12   | PTBP2_RAT   | Up in Dom v. Con<br>(9.31; 0.0014)                                       | No change in males                                                       | Polypyrimidine tract-binding protein 2                                        |
| TR515944 c8_g3_i14    | PTCD3_MOUSE | No change in females                                                     | Up in Sub v. Dom<br>(8.57; 0.011)                                        | Pentatricopeptide repeat domain-containing protein 3, mitochondrial           |



| Trinity Transcript ID | Uniprot ID  | Expression Change in Females<br>(log2FC; FDR)                                    | Expression Change in Males<br>(log2FC; FDR)                                    | Gene                                             |
|-----------------------|-------------|----------------------------------------------------------------------------------|--------------------------------------------------------------------------------|--------------------------------------------------|
| TR186263 c7_g1_i11    | PTHD2_MOUSE | No change in females                                                             | Up in Sub v. Con<br>(8.33; 0.0471)                                             | Protein dispatched homolog 3                     |
| TR185321 c6_g5_i12    | PTN2_RAT    | Up in Dom v. Con<br>(8.31; 0.0152)                                               | No change in males                                                             | Tyrosine-protein phosphatase non-receptor type 2 |
| TR618188 c12_g2_i1    | PTPRA_RAT   | Down in Sub v. Con<br>(-5.39; 0.0274)                                            | No change in males                                                             | Receptor-type tyrosine-protein phosphatase alpha |
| TR44165 c10_g1_i9     | PTPRD_MOUSE | Down in Dom v. Con<br>(-9.9; 0.0161)                                             | No change in males                                                             | Receptor-type tyrosine-protein phosphatase delta |
| TR44165 c10_g1_i4     | PTPRD_MOUSE | Up in Sub v. Con<br>(8.42; 0.0274)                                               | No change in males                                                             | Receptor-type tyrosine-protein phosphatase delta |
| TR44165 c10_g1_i1     | PTPRD_MOUSE | Up in Sub v. Con<br>(8.93; 0.0263)                                               | No change in males                                                             | Receptor-type tyrosine-protein phosphatase delta |
| TR117342 c9_g2_i25    | PTPRS_RAT   | No change in females                                                             | Up in Dom v. Sub<br>(9.42; 0.0342)                                             | Receptor-type tyrosine-protein phosphatase S     |
| TR188330 c12_g1_i5    | PXDN_MOUSE  | No change in females                                                             | Up in Sub v. Dom<br>(9.69; 5.05e-05)                                           | Peroxidasin homolog                              |
| TR368474 c8_g4_i8     | PYRG1_MOUSE | No change in females                                                             | Down in Dom v. Con<br>(-9.03; 0.0066)<br>Down in Sub v. Con<br>(-8.94; 0.0112) | CTP synthase 1                                   |
| TR607537 c9_g13_i2    | QSOX2_MOUSE | No change in females                                                             | Up in Dom v. Sub<br>(8.41; 0.012)                                              | Sulfhydryl oxidase 2                             |
| TR75122 c11_g6_i1     | R12BA_MOUSE | Up in Sub v. Con<br>(9.49; 0.0326)                                               | No change in males                                                             | RNA-binding protein 12B-A                        |
| TR743387 c1_g1_i17    | R3HD2_MOUSE | No change in females                                                             | Down in Dom v. Con<br>(-9.08; 0.0073)<br>Down in Sub v. Con<br>(-8.99; 0.0123) | R3H domain-containing protein 2                  |
| TR253589 c7_g1_i4     | RA51D_MOUSE | No change in females                                                             | Up in Dom v. Sub<br>(8.91; 0.0129)                                             | DNA repair protein RAD51 homolog 4               |
| TR253589 c7_g1_i3     | RA51D_MOUSE | Up in Sub v. Dom<br>(6.16; 0.0028)                                               | Up in Dom v. Con<br>(5.62; 0.0351)                                             | DNA repair protein RAD51 homolog 4               |
| TR498468 c0_g1_i2     | RAB43_MOUSE | No change in females                                                             | Up in Dom v. Con<br>(8.45; 0.0245)                                             | Ras-related protein Rab-43                       |
| TR76607 c0_g1_i2      | RAD50_RAT   | Up in Dom v. Con<br>(8.36; 0.0129)                                               | No change in males                                                             | DNA repair protein RAD50                         |
| TR538118 c7_g11_i3    | RAN_RAT     | Down in Dom v. Con<br>(-11.07; 0.0017)<br>Down in Sub v. Con<br>(-11.06; 0.0013) | No change in males                                                             | GTP-binding nuclear protein Ran                  |
| TR476256 c8_g2_i5     | RAP1A_RAT   | No change in females                                                             | Up in Sub v. Con<br>(10.11, 0.0289)                                            | Ras-related protein Rap-1A                       |
| TR58470 c1_g1_i1      | RB6I2_MOUSE | No change in females                                                             | Up in Sub v. Dom<br>(5.8; 0.0095)                                              | ELKS/Rab6-interacting/CAST family member 1       |

| Trinity Transcript ID | Uniprot ID  | Expression Change in Females<br>(log2FC; FDR)                                  | Expression Change in Males<br>(log2FC; FDR)                                   | Gene                                                                 |
|-----------------------|-------------|--------------------------------------------------------------------------------|-------------------------------------------------------------------------------|----------------------------------------------------------------------|
| TR543482 c10_g9_i9    | RBGP1_MOUSE | No change in females                                                           | Up in Dom v. Con<br>(10; 0.0267)                                              | Rab GTPase-activating protein 1                                      |
| TR205592 c14_g3_i2    | RBM14_MOUSE | Up in Sub v. Con<br>(8.7; 0.0043)                                              | No change in males                                                            | RNA-binding protein 14                                               |
| TR692274 c4_g2_i5     | RECQ4_MOUSE | Up in Sub v. Dom<br>(8.22; 0.0229)                                             | No change in males                                                            | ATP-dependent DNA helicase Q4                                        |
| TR700954 c0_g1_i12    | RELN_RAT    | Up in Sub v. Dom<br>(8.68; 0.0017)                                             | No change in males                                                            | Reelin                                                               |
| TR92618 c3_g2_i11     | RERE_RAT    | No change in females                                                           | Up in Dom v. Con<br>(8.85; 0.0168)<br>Up in Sub v. Con<br>(8.65; 0.0198)      | Arginine-glutamic acid dipeptide repeats protein                     |
| TR408896 c7_g2_i9     | RFIP3_MOUSE | No change in females                                                           | Up in Sub v. Con<br>(8.73; 0.0167)                                            | Rab11 family-interacting protein 3                                   |
| TR255783 c12_g1_i1    | RFX4_MOUSE  | Down in Sub v. Con<br>(-8.74; 0.0027)<br>Down in Sub v. Dom<br>(-8.99; 0.0009) | No change in males                                                            | Transcription factor RFX4                                            |
| TR84362 c5_g2_i24     | RIMS1_MOUSE | Up in Sub v. Con<br>(8.68; 0.005)<br>Up in Sub v. Dom<br>(8.62; 0.0064)        | No change in males                                                            | Regulating synaptic membrane exocytosis protein 1                    |
| TR437166 c0_g1_i7     | RL3_MOUSE   | No change in females                                                           | Up in Dom v. Con<br>(10.5; 1.82e-07)                                          | 60S ribosomal protein L3                                             |
| TR175708 c4_g1_i2     | RL4_MOUSE   | No change in females                                                           | Up in Sub v. Dom<br>(8.26; 0.0182)                                            | 60S ribosomal protein L4                                             |
| TR516330 c10_g1_i1    | RN121_MOUSE | No change in females                                                           | Up in Sub v. Con<br>(9.63; 9.65e-05)                                          | RING finger protein 121                                              |
| TR631917 c2_g1_i14    | RN123_RAT   | Up in Dom v. Sub<br>(9.91; 0.021)                                              | No change in males                                                            | E3 ubiquitin-protein ligase RNF123                                   |
| TR403545 c0_g1_i3     | RN169_MOUSE | No change in females                                                           | Up in Sub v. Dom<br>(8.28; 0.0156)                                            | E3 ubiquitin-protein ligase RNF169                                   |
| TR604819 c0_g3_i31    | RN213_MOUSE | Down in Sub v. Con<br>(-10.39; 3.55e-13)                                       | No change in males                                                            | E3 ubiquitin-protein ligase RNF213                                   |
| TR437936 c11_g1_i9    | ROGDI_RAT   | Down in Dom v. Con<br>(-8.33; 0.0215)                                          | No change in males                                                            | Protein rogdi homolog                                                |
| TR34457 c7_g3_i7      | RPAP3_RAT   | No change in females                                                           | Up in Dom v. Sub<br>(8.08; 0.0416)                                            | RNA polymerase II-associated protein 3                               |
| TR411257 c1_g4_i17    | RPGR1_MOUSE | No change in females                                                           | Up in Dom v. Sub<br>(9.78; 4.90e-06)                                          | X-linked retinitis pigmentosa GTPase regulator-interacting protein 1 |
| TR566505 c9_g5_i4     | RPKL1_MOUSE | No change in females                                                           | Down in Dom v. Con<br>(-9.2; 0.0009)<br>Down in Sub v. Con<br>(-9.12; 0.0014) | Ribosomal protein S6 kinase-like 1                                   |

| Trinity Transcript ID | Uniprot ID  | Expression Change in Females<br>(log2FC; FDR)                                    | Expression Change in Males<br>(log2FC; FDR)                                | Gene                                                                        |
|-----------------------|-------------|----------------------------------------------------------------------------------|----------------------------------------------------------------------------|-----------------------------------------------------------------------------|
| TR48032 c6_g1_i1      | RPN2_RAT    | Down in Sub v. Con<br>(-8.24; 0.0373)                                            | No change in males                                                         | Dolichyl-diphosphooligosaccharide--protein glycosyltransferase subunit 2    |
| TR47678 c14_g1_i6     | RRFM_RAT    | No change in females                                                             | Up in Sub v. Dom<br>(8.54; 0.0084)                                         | Ribosome-recycling factor, mitochondrial                                    |
| TR410399 c11_g4_i3    | RT15_RAT    | Up in Sub v. Con<br>(8.14; 0.0415)                                               | No change in males                                                         | 28S ribosomal protein S15, mitochondrial                                    |
| TR584664 c10_g2_i9    | RUBIC_MOUSE | No change in females                                                             | Up in Dom v. Con<br>(9.91; 0.029)<br>Up in Sub v. Con<br>(10.93; 8.42e-08) | Run domain Beclin-1-interacting and cysteine-rich domain-containing protein |
| TR518595 c3_g3_i3     | RUFY1_MOUSE | Down in Sub v. Con<br>(-8.55; 0.0077)                                            | No change in males                                                         | RUN and FYVE domain-containing protein 1                                    |
| TR605459 c0_g3_i4     | RUSD1_MOUSE | Up in Dom v. Sub<br>(9.94; 0.0124)                                               | No change in males                                                         | RNA pseudouridylate synthase domain-containing protein 1                    |
| TR458627 c7_g1_i2     | RXFP1_RAT   | Up in Dom v. Sub<br>(8.97; 0.0022)                                               | No change in males                                                         | Relaxin receptor 1                                                          |
| TR658790 c12_g1_i5    | S15A2_MOUSE | No change in females                                                             | Up in Dom v. Sub<br>(9.83; 1.59e-08)                                       | Solute carrier family 15 member 2                                           |
| TR658790 c12_g1_i3    | S15A2_MOUSE | No change in females                                                             | Up in Sub v. Con<br>(9.75; 0.0001)<br>Up in Sub v. Dom<br>(4.02; 0.0083)   | Solute carrier family 15 member 2                                           |
| TR553895 c1_g3_i4     | S22AN_MOUSE | Up in Sub v. Dom<br>(10.24; 0.0042)                                              | No change in males                                                         | Solute carrier family 22 member 23                                          |
| TR292620 c7_g1_i10    | S39AC_MOUSE | Up in Dom v. Sub<br>(8.4; 0.0182)                                                | No change in males                                                         | Zinc transporter ZIP12                                                      |
| TR93960 c6_g1_i5      | S4A10_MOUSE | Down in Dom v. Con<br>(-7.65; 0.0289)<br>Down in Dom v. Sub<br>(-8.86; 1.85e-26) | No change in males                                                         | Sodium-driven chloride bicarbonate exchanger                                |
| TR479334 c10_g5_i10   | S61A2_MOUSE | Up in Dom v. Sub<br>(6.9; 0.008)                                                 | No change in males                                                         | Protein transport protein Sec61 subunit alpha isoform 2                     |
| TR171712 c0_g1_i2     | SARDH_MOUSE | Down in Dom v. Con<br>(-8.34; 0.0193)                                            | No change in males                                                         | Sarcosine dehydrogenase, mitochondrial                                      |
| TR576065 c6_g1_i9     | SC24A_MOUSE | Down in Sub v. Con<br>(-9.49; 0.0395)                                            | Up in Dom v. Sub<br>(9.01; 0.0002)                                         | Protein transport protein Sec24A                                            |
| TR260313 c7_g4_i4     | SDCG3_MOUSE | No change in females                                                             | Up in Sub v. Con<br>(9.77; 0.0003)                                         | Serologically defined colon cancer antigen 3 homolog                        |
| TR725493 c4_g4_i10    | SE1L1_MESAU | Up in Dom v. Sub<br>(9.4; 0.0009)                                                | No change in males                                                         | Protein sel-1 homolog 1                                                     |
| TR317120 c0_g2_i1     | SEM3C_MOUSE | Up in Sub v. Con<br>(9.02; 0.0002)                                               | No change in males                                                         | Semaphorin-3C                                                               |
| TR731590 c9_g2_i13    | SEM4D_MOUSE | No change in females                                                             | Up in Sub v. Dom<br>(9.76; 0.0003)                                         | Semaphorin-4D                                                               |

| Trinity Transcript ID | Uniprot ID  | Expression Change in Females<br>(log2FC; FDR)                            | Expression Change in Males<br>(log2FC; FDR)                               | Gene                                                       |
|-----------------------|-------------|--------------------------------------------------------------------------|---------------------------------------------------------------------------|------------------------------------------------------------|
| TR363510 c6_g3_i17    | SENP6_MOUSE | No change in females                                                     | Up in Sub v. Con<br>(8.33; 0.0494)                                        | Sentrin-specific protease 6                                |
| TR302088 c13_g1_i9    | SERC5_RAT   | Up in Sub v. Dom<br>(9.46; 0.0457)                                       | No change in males                                                        | Serine incorporator 5                                      |
| TR31238 c0_g1_i3      | SET1B_MOUSE | No change in females                                                     | Up in Sub v. Dom<br>(8.19; 0.0226)                                        | Histone-lysine N-methyltransferase SETD1B                  |
| TR448160 c5_g1_i7     | SFR19_MOUSE | No change in females                                                     | Up in Sub v. Dom<br>(8.12; 0.0279)                                        | Splicing factor, arginine/serine-rich 19                   |
| TR197077 c5_g1_i12    | SGIP1_MOUSE | No change in females                                                     | Down in Dom v. Con<br>(-9.92; 5.91e-06)                                   | SH3-containing GRB2-like protein 3-interacting protein 1   |
| TR698500 c15_g1_i3    | SH3B4_MOUSE | Down in Dom v. Con<br>(-8.81; 0.0012)                                    | No change in males                                                        | SH3 domain-binding protein 4                               |
| TR562281 c0_g4_i9     | SH3K1_MOUSE | No change in females                                                     | Up in Dom v. Sub<br>(8.07; 0.0332)                                        | SH3 domain-containing kinase-binding protein 1             |
| TR124845 c7_g5_i4     | SI1L2_MOUSE | No change in females                                                     | Up in Sub v. Con<br>(8.49; 0.0387)                                        | Signal-induced proliferation-associated 1-like protein 2   |
| TR214033 c1_g1_i5     | SLF2_MOUSE  | No change in females                                                     | Up in Dom v. Sub<br>(8.17; 0.0288)                                        | SMC5-SMC6 complex localization factor protein 2            |
| TR685188 c6_g1_i8     | SLIK2_MOUSE | Down in Dom v. Con<br>(-9.29; 0.0026)                                    | No change in males                                                        | SLIT and NTRK-like protein 2                               |
| TR325443 c11_g1_i3    | SMS1_RAT    | Up in Sub v. Con<br>(8.79; 0.0019)                                       | No change in males                                                        | Phosphatidylcholine:ceramide cholinephosphotransferase 1   |
| TR102150 c7_g3_i8     | SNX30_MOUSE | Up in Sub v. Dom<br>(9.97; 0.0094)                                       | No change in males                                                        | Sorting nexin-30                                           |
| TR44352 c8_g3_i9      | SO3A1_MOUSE | No change in females                                                     | Up in Dom v. Con<br>(10.31; 0.0141)<br>Up in Sub v. Con<br>(9.82; 0.0462) | Solute carrier organic anion transporter family member 3A1 |
| TR44352 c8_g3_i6      | SO3A1_MOUSE | Up in Sub v. Con<br>(9.5; 0.0275)                                        | No change in males                                                        | Solute carrier organic anion transporter family member 3A1 |
| TR395659 c3_g4_i1     | SOAT1_CRIGR | No change in females                                                     | Up in Dom v. Sub<br>(8.25; 0.0196)                                        | Sterol O-acyltransferase 1                                 |
| TR411257 c1_g4_i18    | SP16H_MOUSE | No change in females                                                     | Up in Sub v. Con<br>(11.14; 4.64e-10)                                     | FACT complex subunit SPT16                                 |
| TR394431 c5_g1_i11    | SPB1_MOUSE  | Up in Dom v. Con<br>(9.74; 0.0109)<br>Up in Sub v. Con<br>(9.79; 0.0178) | No change in males                                                        | pre-rRNA processing protein FTSJ3                          |
| TR440022 c5_g3_i8     | SPIR1_MOUSE | Up in Sub v. Dom<br>(6.78; 0.0111)                                       | No change in males                                                        | Protein spire homolog 1                                    |
| TR739932 c10_g1_i7    | SPTB2_MOUSE | No change in females                                                     | Up in Dom v. Sub<br>(9.44; 0.041)                                         | Spectrin beta chain, non-erythrocytic 1                    |
| TR331878 c11_g3_i11   | SRGEF_MOUSE | Up in Dom v. Sub<br>(8.82; 0.0017)                                       | No change in males                                                        | Secretion-regulating guanine nucleotide exchange factor    |

| Trinity Transcript ID | Uniprot ID  | Expression Change in Females<br>(log2FC; FDR) | Expression Change in Males<br>(log2FC; FDR)                                         | Gene                                                         |
|-----------------------|-------------|-----------------------------------------------|-------------------------------------------------------------------------------------|--------------------------------------------------------------|
| TR437104 c8_g1_i5     | SRRT_MOUSE  | No change in females                          | Up in Dom v. Sub<br>(8.34; 0.0218)                                                  | Serrate RNA effector molecule homolog                        |
| TR50333 c3_g3_i8      | SSH2_MOUSE  | Up in Sub v. Dom<br>(8.79; 0.001)             | No change in males                                                                  | Protein phosphatase Slingshot homolog 2                      |
| TR161608 c0_g1_i4     | SSPO_RAT    | No change in females                          | Up in Dom v. Con<br>(9.19; 0.0009)                                                  | SCO-spondin                                                  |
| TR45260 c7_g10_i5     | ST4A1_RAT   | Up in Sub v. Con<br>(9.27; 0.0489)            | No change in males                                                                  | Sulfotransferase 4A1                                         |
| TR158450 c3_g2_i9     | ST5_MOUSE   | No change in females                          | Up in Dom v. Sub<br>(6.95; 1.30e-08)                                                | Suppression of tumorigenicity 5 protein                      |
| TR158450 c3_g2_i18    | ST5_MOUSE   | No change in females                          | Up in Sub v. Con<br>(9.29; 0.0007)<br>Up in Sub v. Dom<br>(6.53; 9.00e-05)          | Suppression of tumorigenicity 5 protein                      |
| TR618173 c6_g4_i2     | STIMA_MOUSE | Up in Sub v. Dom<br>(8.26; 0.0464)            | No change in males                                                                  | Store-operated calcium entry regulator<br>STIMATE            |
| TR131572 c5_g1_i6     | STRN3_MOUSE | No change in females                          | Down in Sub v. Con<br>(-10.96; 4.64e-10)<br>Down in Sub v. Dom<br>(-12.4; 1.31e-27) | Striatin-3                                                   |
| TR153049 c0_g3_i14    | STXB4_MOUSE | Down in Dom v. Con<br>(-9.56; 1.51e-06)       | No change in males                                                                  | Syntaxin-binding protein 4                                   |
| TR153049 c0_g3_i5     | STXB4_MOUSE | No change in females                          | Up in Sub v. Con<br>(9.82; 6.05e-05)                                                | Syntaxin-binding protein 4                                   |
| TR153049 c0_g3_i2     | STXB4_MOUSE | Up in Dom v. Con<br>(10.36; 4.94e-12)         | No change in males                                                                  | Syntaxin-binding protein 4                                   |
| TR544782 c12_g2_i3    | STXB6_MOUSE | No change in females                          | Up in Dom v. Con<br>(9.01; 0.0053)                                                  | Syntaxin-binding protein 6                                   |
| TR359468 c5_g2_i14    | SV2B_RAT    | Up in Sub v. Con<br>(6.75; 1.18e-08)          | No change in males                                                                  | Synaptic vesicle glycoprotein 2B                             |
| TR462716 c18_g1_i6    | SYHM_MOUSE  | Down in Sub v. Con<br>(-9.46; 0.0328)         | No change in males                                                                  | Probable histidine--tRNA ligase, mitochondrial               |
| TR287017 c8_g1_i9     | SYTC_MOUSE  | Up in Dom v. Sub<br>(9.52; 0.0271)            | No change in males                                                                  | Threonine--tRNA ligase, cytoplasmic                          |
| TR437257 c5_g4_i5     | SZT2_MOUSE  | Down in Dom v. Con<br>(-8.29; 0.0336)         | No change in males                                                                  | KICSTOR complex protein SZT2                                 |
| TR437257 c5_g4_i18    | SZT2_MOUSE  | Up in Sub v. Con<br>(10.16; 0.0083)           | No change in males                                                                  | KICSTOR complex protein SZT2                                 |
| TR431493 c13_g1_i1    | T22D4_MOUSE | Down in Sub v. Con<br>(-8.67; 0.0043)         | No change in males                                                                  | TSC22 domain family protein 4                                |
| TR608582 c3_g1_i2     | T2EA_MOUSE  | Down in Sub v. Con<br>(-8.29; 0.0363)         | No change in males                                                                  | General transcription factor IIE subunit 1                   |
| TR668226 c2_g1_i9     | TAPT1_MOUSE | Up in Sub v. Dom<br>(8.25; 0.0202)            | No change in males                                                                  | Transmembrane anterior posterior<br>transformation protein 1 |

| Trinity Transcript ID | Uniprot ID  | Expression Change in Females<br>(log2FC; FDR)                                | Expression Change in Males<br>(log2FC; FDR)                                   | Gene                                                    |
|-----------------------|-------------|------------------------------------------------------------------------------|-------------------------------------------------------------------------------|---------------------------------------------------------|
| TR744091 c5_g3_i8     | TBA1B_RAT   | No change in females                                                         | Up in Dom v. Con<br>(9.87; 3.46e-05)<br>Up in Dom v. Sub<br>(10.86; 1.15e-09) | Tubulin alpha-1B chain                                  |
| TR308518 c2_g1_i30    | TBC24_MOUSE | No change in females                                                         | Up in Dom v. Con<br>(8.59; 0.0411)<br>Up in Dom v. Sub<br>(8.81; 0.0069)      | TBC1 domain family member 24                            |
| TR308518 c2_g1_i26    | TBC24_MOUSE | Up in Dom v. Sub<br>(10.23; 5.65e-10)                                        | No change in males                                                            | TBC1 domain family member 24                            |
| TR180325 c6_g1_i5     | TEN1_MOUSE  | No change in females                                                         | Up in Sub v. Dom<br>(10.36; 0.0092)                                           | Teneurin-1                                              |
| TR180325 c6_g1_i16    | TEN1_MOUSE  | Up in Dom v. Con<br>(2.25; 0.0475)                                           | No change in males                                                            | Teneurin-1                                              |
| TR489754 c12_g2_i5    | TENR_MOUSE  | Down in Sub v. Con<br>(-8.92; 5.04e-06)                                      | No change in males                                                            | Tenascin-R                                              |
| TR504870 c13_g1_i17   | TENS3_MOUSE | Up in Dom v. Con<br>(8.36; 0.0137)                                           | No change in males                                                            | Tensin-3                                                |
| TR260582 c0_g1_i7     | TEP1_RAT    | Up in Sub v. Dom<br>(8.39; 0.0094)                                           | No change in males                                                            | Telomerase protein component 1                          |
| TR587501 c4_g1_i39    | TESK2_RAT   | No change in females                                                         | Up in Dom v. Sub<br>(8; 0.0416)                                               | Dual specificity testis-specific protein kinase 2       |
| TR414167 c3_g5_i8     | TET3_MOUSE  | Up in Sub v. Dom<br>(8.71; 0.0014)                                           | No change in males                                                            | Methylcytosine dioxygenase TET3                         |
| TR87292 c6_g4_i6      | THOC5_MOUSE | Up in Dom v. Sub<br>(8.49; 0.0103)                                           | No change in males                                                            | THO complex subunit 5 homolog                           |
| TR732783 c2_g2_i5     | TICN3_MOUSE | Up in Sub v. Con<br>(10.3; 0.0043)                                           | No change in males                                                            | Testican-3                                              |
| TR320086 c15_g2_i4    | TJAP1_MOUSE | No change in females                                                         | Up in Dom v. Con<br>(9.57; 0.0003)                                            | Tight junction-associated protein 1                     |
| TR275346 c15_g6_i7    | TM2D1_MOUSE | Up in Sub v. Con<br>(9.83; 1.76e-08)<br>Up in Sub v. Dom<br>(9.76; 4.84e-08) | Down in Dom v. Con<br>(-9.62; 0.0422)                                         | TM2 domain-containing protein 1                         |
| TR305885 c0_g2_i1     | TM40L_RAT   | No change in females                                                         | Up in Dom v. Sub<br>(8.62; 0.0156)                                            | Mitochondrial import receptor subunit<br>TOM40B         |
| TR291968 c10_g2_i20   | TNPO1_MOUSE | No change in females                                                         | Up in Dom v. Sub<br>(8.03; 0.039)                                             | Transportin-1                                           |
| TR726894 c16_g1_i3    | TNR21_RAT   | No change in females                                                         | Up in Dom v. Sub<br>(9.95; 0.012)                                             | Tumor necrosis factor receptor superfamily<br>member 21 |
| TR159288 c5_g1_i5     | TRI33_MOUSE | No change in females                                                         | Down in Dom v. Con<br>(-10.39; 0.0157)                                        | E3 ubiquitin-protein ligase TRIM33                      |

| Trinity Transcript ID | Uniprot ID  | Expression Change in Females<br>(log2FC; FDR) | Expression Change in Males<br>(log2FC; FDR)                                          | Gene                                                                 |
|-----------------------|-------------|-----------------------------------------------|--------------------------------------------------------------------------------------|----------------------------------------------------------------------|
| TR359329 c6_g4_i9     | TRIM9_MOUSE | No change in females                          | Up in Dom v. Con<br>(6.75; 0.0151)<br>Up in Dom v. Sub<br>(9.02; 0.0001)             | E3 ubiquitin-protein ligase TRIM9                                    |
| TR359329 c6_g4_i1     | TRIM9_MOUSE | No change in females                          | Up in Sub v. Dom<br>(9.31; 1.36e-05)                                                 | E3 ubiquitin-protein ligase TRIM9                                    |
| TR501811 c9_g2_i10    | TRM6_MOUSE  | No change in females                          | Up in Dom v. Sub<br>(8.19; 0.0249)                                                   | tRNA (adenine(58)-N(1))-methyltransferase non-catalytic subunit TRM6 |
| TR248969 c0_g2_i5     | TSN9_MOUSE  | No change in females                          | Up in Dom v. Con<br>(10.87; 1.78e-09)<br>Up in Sub v. Con<br>(10.44; 4.60e-07)       | Tetraspanin-9                                                        |
| TR507460 c8_g3_i8     | TTC14_MOUSE | Down in Dom v. Con<br>(-8.97; 0.0003)         | No change in males                                                                   | Tetratricopeptide repeat protein 14                                  |
| TR492995 c9_g1_i9     | TTC33_MOUSE | No change in females                          | Down in Dom v. Con<br>(-9.61; 0.0499)                                                | Tetratricopeptide repeat protein 33                                  |
| TR604218 c2_g2_i3     | TTHY_MOUSE  | No change in females                          | Down in Dom v. Con<br>(-16.47; 0.0034)                                               | Transthyretin                                                        |
| TR714608 c5_g2_i7     | TULP4_MOUSE | Up in Sub v. Dom<br>(10.16; 1.57e-10)         | Down in Sub v. Con<br>(-11.66; 0.0123)                                               | Tubby-related protein 4                                              |
| TR710623 c5_g3_i26    | TUTLA_RAT   | Down in Sub v. Con<br>(-2.09; 0.0164)         | No change in males                                                                   | Protein turtle homolog A                                             |
| TR747055 c11_g2_i7    | U730_MOUSE  | No change in females                          | Down in Sub v. Con<br>(-12.91; 1.35e-20)<br>Down in Sub v. Dom<br>(-12.45; 2.08e-26) | Putative UPF0730 protein encoded by LINC00643 homolog                |
| TR747055 c11_g2_i2    | U730_MOUSE  | No change in females                          | Down in Sub v. Con<br>(-11.51; 1.48e-11)<br>Down in Sub v. Dom<br>(-11.83; 3.28e-26) | Putative UPF0730 protein encoded by LINC00643 homolog                |
| TR747055 c11_g2_i10   | U730_MOUSE  | No change in females                          | Down in Sub v. Con<br>(-6.26; 0.0099)<br>Down in Sub v. Dom<br>(-5.79; 0.0085)       | Putative UPF0730 protein encoded by LINC00643 homolog                |
| TR747055 c11_g2_i5    | U730_MOUSE  | No change in females                          | Up in Sub v. Con<br>(14.04; 9.83e-28)                                                | Putative UPF0730 protein encoded by LINC00643 homolog                |
| TR406880 c1_g1_i3     | UAP1_MOUSE  | No change in females                          | Up in Dom v. Con<br>(8.29; 0.038)                                                    | UDP-N-acetylhexosamine pyrophosphorylase                             |
| TR421338 c4_g2_i13    | UBA6_MOUSE  | No change in females                          | Down in Sub v. Con<br>(-11.29; 3.17e-12)<br>Down in Sub v. Dom<br>(-10.79; 0.0019)   | Ubiquitin-like modifier-activating enzyme 6                          |
| TR410867 c3_g3_i19    | UBP40_MOUSE | No change in females                          | Up in Dom v. Sub<br>(8.37; 0.0116)                                                   | Ubiquitin carboxyl-terminal hydrolase 40                             |

| Trinity Transcript ID | Uniprot ID  | Expression Change in Females<br>(log2FC; FDR)                                    | Expression Change in Males<br>(log2FC; FDR)                              | Gene                                                   |
|-----------------------|-------------|----------------------------------------------------------------------------------|--------------------------------------------------------------------------|--------------------------------------------------------|
| TR696425 c2_g1_i14    | UBP53_MOUSE | Down in Dom v. Con<br>(-10.93; 1.93e-11)                                         | Up in Sub v. Con<br>(9.95; 0.0485)                                       | Inactive ubiquitin carboxyl-terminal hydrolase 53      |
| TR679315 c3_g4_i11    | UBXN6_MOUSE | Up in Dom v. Sub<br>(8.78; 0.0019)                                               | No change in males                                                       | UBX domain-containing protein 6                        |
| TR258018 c2_g3_i6     | USE1_MOUSE  | Down in Sub v. Con<br>(-8.47; 0.0054)                                            | No change in males                                                       | Vesicle transport protein USE1                         |
| TR122651 c12_g2_i12   | VDAC2_MOUSE | Up in Dom v. Sub<br>(5.49; 0.0055)                                               | No change in males                                                       | Voltage-dependent anion-selective channel protein 2    |
| TR81700 c4_g2_i10     | VP13C_MOUSE | No change in females                                                             | Up in Dom v. Con<br>(8.79; 0.0092)<br>Up in Sub v. Con<br>(8.64; 0.0417) | Vacuolar protein sorting-associated protein 13C        |
| TR43107 c13_g1_i15    | VPP2_MOUSE  | No change in females                                                             | Up in Dom v. Con<br>(8.91; 0.0117)<br>Up in Sub v. Con<br>(8.83; 0.0123) | V-type proton ATPase 116 kDa subunit a isoform 2       |
| TR109117 c3_g1_i16    | VPS51_MOUSE | Up in Dom v. Sub<br>(9.34; 0.0467)                                               | No change in males                                                       | Vacuolar protein sorting-associated protein 51 homolog |
| TR36520 c2_g2_i7      | WDR35_MOUSE | No change in females                                                             | Up in Sub v. Con<br>(9.95; 2.49e-05)                                     | WD repeat-containing protein 35                        |
| TR50291 c16_g2_i6     | WDR76_MOUSE | Up in Dom v. Sub<br>(9.13; 0.0004)                                               | No change in males                                                       | WD repeat-containing protein 76                        |
| TR64740 c5_g2_i6      | WNK3_MOUSE  | Down in Dom v. Con<br>(-9.37; 1.41e-05)                                          | No change in males                                                       | Serine/threonine-protein kinase WNK3                   |
| TR64740 c5_g2_i10     | WNK3_MOUSE  | Down in Sub v. Con<br>(-6.33; 0.0017)<br>Down in Sub v. Dom<br>(-7.69; 2.31e-06) | No change in males                                                       | Serine/threonine-protein kinase WNK3                   |
| TR64740 c5_g2_i2      | WNK3_MOUSE  | Up in Sub v. Dom<br>(11.18; 1.80e-17)                                            | No change in males                                                       | Serine/threonine-protein kinase WNK3                   |
| TR231901 c0_g1_i2     | WNK4_RAT    | No change in females                                                             | Up in Dom v. Con<br>(8.77; 0.0065)                                       | Serine/threonine-protein kinase WNK4                   |
| TR605741 c9_g2_i1     | WNT5A_MOUSE | Up in Sub v. Con<br>(8.04; 0.0415)                                               | No change in males                                                       | Protein Wnt-5a                                         |
| TR239373 c2_g2_i5     | WRIP1_MOUSE | No change in females                                                             | Up in Sub v. Dom<br>(8.21; 0.0188)                                       | ATPase WRNIP1                                          |
| TR150419 c4_g6_i12    | WSCD1_MOUSE | Down in Dom v. Con<br>(-9.54; 0.0356)<br>Down in Sub v. Con<br>(-9.52; 0.0274)   | No change in males                                                       | WSC domain-containing protein 1                        |
| TR677393 c7_g2_i2     | XCT_MOUSE   | No change in females                                                             | Up in Dom v. Con<br>(9.93; 0.029)<br>Up in Dom v. Sub<br>(10.15; 0.0075) | Cystine/glutamate transporter                          |



| Trinity Transcript ID | Uniprot ID  | Expression Change in Females<br>(log2FC; FDR)                             | Expression Change in Males<br>(log2FC; FDR)                                 | Gene                                                                   |
|-----------------------|-------------|---------------------------------------------------------------------------|-----------------------------------------------------------------------------|------------------------------------------------------------------------|
| TR677393 c7_g2_i7     | XCT_MOUSE   | No change in females                                                      | Up in Dom v. Con<br>(9.75; 0.0447)<br>Up in Dom v. Sub<br>(9.96; 0.011)     | Cystine/glutamate transporter                                          |
| TR148272 c7_g2_i14    | XPO2_MOUSE  | No change in females                                                      | Up in Dom v. Con<br>(5.21; 0.0471)                                          | Exportin-2                                                             |
| TR733280 c3_g1_i2     | XPO4_MOUSE  | Up in Dom v. Sub<br>(8.83; 0.0015)                                        | Up in Dom v. Con<br>(8.45; 0.047)<br>Up in Dom v. Sub<br>(8.67; 0.0081)     | Exportin-4                                                             |
| TR354440 c8_g2_i14    | YETS2_MOUSE | Down in Sub v. Con<br>(-9.18; 6.57e-05)                                   | No change in males                                                          | YEATS domain-containing protein 2                                      |
| TR225190 c11_g2_i14   | YIF1B_MOUSE | Up in Dom v. Con<br>(9.47; 7.93e-05)                                      | No change in males                                                          | Protein YIF1B                                                          |
| TR673677 c11_g1_i3    | YTHD3_MOUSE | Down in Sub v. Con<br>(-8.35; 0.0174)                                     | No change in males                                                          | YTH domain-containing family protein 3                                 |
| TR642349 c0_g2_i7     | ZDH17_RAT   | No change in females                                                      | Up in Sub v. Con<br>(9.61; 0.0001)                                          | Palmitoyltransferase ZDHHC17                                           |
| TR434034 c15_g7_i15   | ZEP2_RAT    | No change in females                                                      | Up in Dom v. Con<br>(11.02; 9.53e-09)<br>Up in Sub v. Con<br>(10.1; 0.0468) | Human immunodeficiency virus type I enhancer-binding protein 2 homolog |
| TR434034 c15_g7_i19   | ZEP2_RAT    | No change in females                                                      | Up in Dom v. Con<br>(9.91; 0.0003)<br>Up in Sub v. Con<br>(10.36; 8.69e-05) | Human immunodeficiency virus type I enhancer-binding protein 2 homolog |
| TR372268 c8_g1_i13    | ZEP3_MOUSE  | Down in Sub v. Con<br>(-8.26; 0.0445)                                     | No change in males                                                          | Transcription factor HIVEP3                                            |
| TR372268 c8_g1_i10    | ZEP3_MOUSE  | No change in females                                                      | Up in Dom v. Con<br>(8.87; 0.0073)                                          | Transcription factor HIVEP3                                            |
| TR504036 c0_g1_i1     | ZFP62_MOUSE | Up in Dom v. Con<br>(9.2; 5.95e-05)                                       | No change in males                                                          | Zinc finger protein 62                                                 |
| TR319959 c6_g4_i4     | ZFY26_MOUSE | Up in Dom v. Sub<br>(8.67; 0.0023)                                        | No change in males                                                          | Zinc finger FYVE domain-containing protein 26                          |
| TR585004 c0_g3_i11    | ZN106_MOUSE | No change in females                                                      | Down in Dom v. Con<br>(-6.61; 0.0001)                                       | Zinc finger protein 106                                                |
| TR405877 c5_g1_i3     | ZN281_MOUSE | Up in Sub v. Con<br>(10.8; 0.0017)<br>Up in Sub v. Dom<br>(10.74; 0.0016) | No change in males                                                          | Zinc finger protein 281                                                |
| TR235840 c9_g1_i14    | ZN532_MOUSE | No change in females                                                      | Up in Dom v. Con<br>(8.46; 0.0225)<br>Up in Sub v. Con<br>(8.59; 0.0459)    | Zinc finger protein 532                                                |

| Trinity Transcript ID | Uniprot ID  | Expression Change in Females<br>(log2FC; FDR)                            | Expression Change in Males<br>(log2FC; FDR) | Gene                        |
|-----------------------|-------------|--------------------------------------------------------------------------|---------------------------------------------|-----------------------------|
| TR381605 c9_g2_i1     | ZN775_MOUSE | Up in Sub v. Con<br>(9.72; 0.0262)<br>Up in Sub v. Dom<br>(9.66; 0.0281) | No change in males                          | Zinc finger protein 775     |
| TR193324 c4_g1_i14    | ZO1_MOUSE   | Up in Dom v. Con<br>(8.7; 0.0079)                                        | No change in males                          | Tight junction protein ZO-1 |
| TR193324 c4_g1_i4     | ZO1_MOUSE   | Up in Dom v. Con<br>(9.95; 1.89e-05)                                     | No change in males                          | Tight junction protein ZO-1 |

**Supplemental Table 4:** Gene ontology terms that were significantly enriched in dominant and subordinate females compared with home cage controls (MF = molecular function; CC = cellular component; BP = biological processes)

| GO Term                                                                  | Ontology | FDR   |
|--------------------------------------------------------------------------|----------|-------|
| Siderophore transporter activity                                         | MF       | 0.004 |
| Enterobactin transporter activity                                        | MF       | 0.004 |
| Acetylcholine receptor activator activity                                | MF       | 0.004 |
| ErbB-2 class receptor binding                                            | MF       | 0.004 |
| Cyclin-dependent protein kinase 5 holoenzyme complex                     | CC       | 0.004 |
| Serine phosphorylation of STAT3 protein                                  | BP       | 0.004 |
| Cerebellar cortex formation                                              | BP       | 0.007 |
| Negative regulation of synaptic plasticity                               | BP       | 0.007 |
| Sensory perception of sour taste                                         | BP       | 0.008 |
| ErbB-3 class receptor binding                                            | MF       | 0.006 |
| Serine phosphorylation of STAT protein                                   | BP       | 0.006 |
| Detection of chemical stimulus involved in sensory perception of pain    | BP       | 0.006 |
| Ligand-gated sodium channel activity                                     | MF       | 0.009 |
| Acetylcholine receptor regulator activity                                | MF       | 0.041 |
| Detection of mechanical stimulus involved in sensory perception of pain  | BP       | 0.024 |
| Synaptic transmission, dopaminergic                                      | BP       | 0.012 |
| Negative regulation of protein export from nucleus                       | BP       | 0.034 |
| Cerebellar cortex development                                            | BP       | 0.030 |
| Corpus callosum development                                              | BP       | 0.041 |
| Behavioral response to cocaine                                           | BP       | 0.030 |
| Detection of temperature stimulus involved in sensory perception         | BP       | 0.041 |
| Detection of temperature stimulus involved in sensory perception of pain | BP       | 0.041 |
| Detection of temperature stimulus                                        | BP       | 0.041 |
| Sensory perception of taste                                              | BP       | 0.041 |
| Detection of chemical stimulus involved in sensory perception            | BP       | 0.031 |
| Receptor activator activity                                              | MF       | 0.041 |
| Response to acidic Ph                                                    | BP       | 0.041 |
| Skeletal muscle tissue development                                       | BP       | 0.012 |
| Negative regulation of nucleocytoplasmic transport                       | BP       | 0.033 |
| Negative regulation of intracellular protein transport                   | BP       | 0.039 |
| Negative regulation of cytoplasmic transport                             | BP       | 0.041 |
| Striated muscle tissue development                                       | BP       | 0.033 |
| Muscle tissue development                                                | BP       | 0.041 |
